1 **A *nadA* mutation confers nicotinic acid auxotrophy in pro-carcinogenic intestinal**

2 ***Escherichia coli* NC101**

3 Lacey R. Lopez,<sup>a</sup> Cassandra J. Barlogio,<sup>a\*</sup> Christopher A. Broberg,<sup>a\*</sup> Jeremy Wang,<sup>b</sup> Janelle C.  
4 Arthur,<sup>a,c,d#</sup>

5 <sup>a</sup>Department of Microbiology and Immunology, The University of North Carolina at Chapel Hill,  
6 Chapel Hill, North Carolina, United States of America.

7 <sup>b</sup>Department of Genetics, The University of North Carolina at Chapel Hill, Chapel Hill, North  
8 Carolina, United States of America.

9 <sup>c</sup>Center for Gastrointestinal Biology and Disease, The University of North Carolina at Chapel  
10 Hill, Chapel Hill, North Carolina, United States of America.

11 <sup>d</sup>Lineberger Comprehensive Cancer Center, The University of North Carolina at Chapel Hill,  
12 Chapel Hill, North Carolina, United States of America.

13 **Running title:** Eliminating *E. coli* micronutrient constraints

14 \*Present address: Locus Biosciences, Inc., Durham, North Carolina, United States of America.

15 •Present address: Department of Chemistry, The University of North Carolina at Chapel Hill,  
16 Chapel Hill, North Carolina, United States of America

17 #Address correspondence to Janelle C. Arthur, [Janelle\\_arthur@med.unc.edu](mailto:Janelle_arthur@med.unc.edu)

18 **Abstract word count (max 250):** 204 words

19 **Importance word count** (*max 120*): 120 words

20 **Main text word count** (*max 5000*): 3999 words

21

22 **Abstract**

23 Inflammatory bowel diseases and inflammation-associated colorectal cancer are linked to blooms  
24 of adherent-invasive *Escherichia coli* (AIEC) in the intestinal microbiota. AIEC are functionally  
25 defined by their ability to adhere/invade epithelial cells and survive/replicate within  
26 macrophages. Changes in micronutrient availability can alter AIEC physiology and interactions  
27 with host cells. Thus, culturing AIEC for mechanistic investigations often involves precise  
28 nutrient formulation. We observed that the pro-inflammatory and pro-carcinogenic AIEC strain  
29 NC101 failed to grow in minimal media (MM). We hypothesized that NC101 was unable to  
30 synthesize a vital micronutrient normally found in the host gut. Through nutrient  
31 supplementation studies, we identified that NC101 is a nicotinic acid (NA) auxotroph. NA  
32 auxotrophy was not observed in the other non-toxicogenic *E. coli* or AIEC strains we tested.  
33 Sequencing revealed NC101 has a missense mutation in *nadA*, a gene encoding quinolinate  
34 synthase A that is important for *de novo* NAD biosynthesis. Correcting the identified *nadA* point  
35 mutation restored NC101 prototrophy without impacting AIEC function, including motility and  
36 AIEC-defining survival in macrophages. Our findings, along with the generation of a  
37 prototrophic NC101 strain, will greatly enhance the ability to perform *in vitro* functional studies  
38 that are needed for mechanistic investigations on the role of intestinal *E. coli* in digestive disease.

39

## 40 **Importance**

41 Inflammatory bowel diseases (IBD) and colorectal cancer (CRC) are significant global health  
42 concerns that are influenced by gut resident microbes, like adherent-invasive *Escherichia coli*  
43 (AIEC). Nutrient availability influences specialized metabolite production, AIEC-defining  
44 functional attributes, and AIEC:host interactions. NC101 is a pro-inflammatory and pro-  
45 carcinogenic AIEC strain commonly used for studies on IBD and CRC. We identified that  
46 NC101 growth *in vitro* requires a micronutrient found in the host gut. By correcting an identified  
47 mutation, we generated an NC101 strain that no longer has micronutrient restrictions. Our  
48 findings will facilitate future research that necessitates precise nutrient manipulation, enhancing  
49 AIEC functional studies and investigations on other auxotrophic intestinal microbiota members.  
50 Broadly, this will improve the study of bacterial:host interactions impacting health and disease.

51

## 52 **Introduction**

53 Inflammatory bowel diseases (IBD), including Crohn's disease and ulcerative colitis, are a major  
54 global health concern that affects over 3 million adults in the United States alone (1, 2). IBD is a  
55 chronic and multifactorial disease that is driven by aberrant immune responses to commensal  
56 microbes, genetic susceptibility, and environmental factors (3). IBD patients experience painful,  
57 chronic, and relapsing intestinal inflammation that can lead to life-threatening complications,  
58 including intestinal fibrosis and colorectal cancer (CRC) (4, 5). Experimental models have  
59 demonstrated that IBD and CRC can be driven by the intestinal microbiota and that specific  
60 microbes, such as *Escherichia coli*, are associated with human disease (6, 7). IBD and CRC have

61 no single etiology and no cure (8, 9). Therefore, understanding the function of disease-associated  
62 gut microbes may uncover novel therapeutic options for intestinal diseases, like IBD and CRC.

63 Intestinal microbes influence the onset and progression of IBD and CRC via metabolite  
64 production and modulation of mucosal immunity (10–14). *E. coli* are common inhabitants of the  
65 intestinal microbiota (15, 16). Strain level differences can alter the pro-inflammatory or pro-  
66 carcinogenic potential of *E. coli*, partly through changes in small molecule production (12–14,  
67 17, 18). A pathovar of *E. coli*, termed adherent-invasive *E. coli* (AIEC), are enriched in the gut  
68 microbiota of human IBD and CRC patients (19). AIEC exacerbate experimental colitis and  
69 promote CRC in a variety of murine models (17, 18, 20–24). There is no genetic definition for  
70 AIEC (14, 19, 25). Instead, AIEC are classically defined by their ability to adhere/invade  
71 epithelial cells and survive/replicate within macrophages (19, 26). Environmental conditions,  
72 including nutrient availability and intestinal inflammation, can alter AIEC behavior and impact  
73 intestinal colonization and disease (14, 17, 27–30). Therefore, the ability to precisely manipulate  
74 AIEC growth conditions is essential for *in vitro* studies investigating AIEC behavior and  
75 production of pro-inflammatory and pro-carcinogenic molecules.

76 *E. coli* NC101 is a well-known AIEC strain utilized by numerous investigators to study how  
77 intestinal *E. coli* adapt to and influence the host during IBD and CRC (14, 17, 18, 24, 31–33).  
78 NC101 was originally isolated from a specific pathogen free wild-type mouse at North Carolina  
79 State University (34). Colonizing wild-type mice with NC101 does not induce intestinal  
80 pathology, even during monoassociation studies using gnotobiotic animals (17). However,  
81 despite a lack of traditional toxins and virulence factors, NC101 induces antigen-driven intestinal  
82 inflammation in genetically-susceptible IBD mouse models (e.g. interleukin 10 deficient mice)  
83 (34). Thus, NC101 is considered a pathobiont and a highly relevant model organism for defining

84 how susceptible individuals may mount inappropriate immune responses to seemingly innocuous  
85 intestinal *E. coli*.

86 NC101 adapts to the inflamed intestinal milieu by modulating expression of its gene repertoire  
87 (35, 36). Nutrient availability alters AIEC physiology, persistence in the microbiota, and  
88 production of pro-inflammatory and pro-carcinogenic mediators (14, 17, 27–30).

89 Monoassociation studies with gnotobiotic mice have led to the discovery of several AIEC-  
90 derived host-influencing molecules (i.e. specialized metabolites) that drive inflammation and  
91 tumorigenesis, including yersiniabactin and colibactin (17–19). Like many specialized  
92 metabolites, yersiniabactin and colibactin are produced via biosynthetic gene clusters that can be  
93 activated by changes in micronutrient availability, notably iron (37, 38). The nature of AIEC-  
94 derived specialized metabolites makes them difficult to isolate and study in functional assays.  
95 Therefore, the repertoire of AIEC-derived metabolites and their impact on the host has been  
96 largely unexplored.

97 Variations in micronutrient availability can impact the virulence and physiology of AIEC (27,  
98 28, 39). Therefore, culturing AIEC for mechanistic studies necessitates using a simplified base  
99 media that allows for precise nutrient manipulation. During our studies, we observed that  
100 modified M9 minimal media (MM) does not sustain NC101 growth *in vitro*. We hypothesized  
101 that NC101 was an auxotroph. Through nutrient supplementation studies, we discovered that  
102 NC101 requires nicotinic acid (NA, niacin, Vitamin B3) for growth. NA auxotrophy was not  
103 observed in other non-toxigenic laboratory *E. coli* strains (K12 or 25922), AIEC, or non-AIEC  
104 human intestinal strains (40). Genetic evaluation revealed that NC101 has a missense mutation in  
105 the NAD biosynthesis gene (*nadA*) that encodes for quinolinate synthase A. Importantly, we  
106 generated a prototrophic NC101 revertant strain that eliminated *E. coli* micronutrient restraints.

107 Correcting NC101 auxotrophy had negligible impact on NC101 function, including motility and  
108 AIEC-defining survival in macrophages.

109 NC101 micronutrient constraints have limited our ability to perform *in vitro* functional studies,  
110 which often require careful nutrient manipulation. Overall, our findings will enable precise  
111 nutrient manipulation for mechanistic studies on auxotrophic microbiota members, like AIEC,  
112 *Shigella spp.*, or Uropathogenic *E. coli* (41–44). Importantly, our work will facilitate *in vitro*  
113 functional assays and small molecule purification efforts with the pro-inflammatory and pro-  
114 carcinogenic AIEC strain NC101. Furthermore, these studies will broadly improve our  
115 understanding of the microbiota in intestinal diseases like IBD and CRC.

116

## 117 **Results**

### 118 **The pro-carcinogenic adherent-invasive *E. coli* strain NC101 requires nicotinic acid to** 119 **sustain growth**

120 During *in vitro* studies to evaluate AIEC function in long-term culture (24+ hr), we attempted to  
121 passage NC101 in modified M9 minimal media (MM) that includes glycerol and casamino acids.  
122 NC101 can successfully be subcultured from Luria-Bertani (LB) agar or broth, a rich medium, to  
123 MM (17, 28). However, NC101 failed to grow when subcultured from MM to MM (**Fig. 1A-C**).  
124 We hypothesized that NC101 was an auxotroph, unable to synthesize a key nutrient found in the  
125 murine gut. *Shigella spp.*, a transient gut pathogen and close relative of *E. coli*, are generally  
126 nicotinic acid (NA, Niacin, Vitamin B3) auxotrophs (41, 43–45). Thus, we specifically tested

127 whether vitamin supplementation could restore NC101 growth in MM. Supplementing MM with  
128 a complex Vitamin Mix (VM) restored NC101 growth at 8hr and 24hr (**Fig. 1A-B**).

129 To identify which vitamin(s) in the VM were essential for NC101 growth, we supplemented MM  
130 with individual or combinations of VM components and assessed NC101 growth. Tryptophan  
131 supplementation was also tested, as tryptophan metabolism can be influenced by host-microbe  
132 interactions in the gut (46). Only MM containing NA, alone or in combination, sustained NC101  
133 growth in MM at 8hr and 24hr (**Fig. 1B**). Further, NA alone restored normal NC101 growth  
134 kinetics in MM and significantly enhanced growth at 24hr (**Fig. 1C**). NC101 grew when  
135 subcultured from MM to LB, indicating NC101 does not have a global growth defect (**Fig. 1A-**  
136 **C**). Together, these data suggest NC101 is an NA auxotroph.

### 137 **NA auxotrophy is not a defining feature of non-toxigenic *E. coli***

138 Resident non-toxigenic *E. coli* are common among the intestinal microbiota and many are  
139 considered commensal strains (15, 16). Yet, other *E. coli* (e.g. AIEC) are associated with chronic  
140 intestinal inflammation and may be referred to as pathobionts (15, 19). We questioned whether  
141 NA auxotrophy was shared across clinically derived non-toxigenic *E. coli*. In addition to  
142 evaluating model *E. coli* strains (K12 and 25922), we evaluated clinical specimens isolated from  
143 the intestinal mucosa of IBD or non-IBD patients (*E. coli* LF82, 42ET-1, 568-3, HM670, 37RT-  
144 2, 532-9, and 39ES-1) (40, 47, 48) (**Table 1**). These clinical isolates have been characterized in  
145 the lab from which they originated for AIEC status, and at least partial genome sequences are  
146 available for all strains (40). To determine the extent of NA-dependency among these strains, we  
147 passaged isolates in MM with and without NA and assessed growth by measuring optical density  
148 (OD<sub>600</sub>) at 2hr, 4hr, 8hr, and 24hr (**Fig. 2A**). We again observed that NC101 had a growth defect

149 in MM, detectable at 2hr and continuing through 24hr (**Fig. 2A**). However, all examined  
150 laboratory strains and clinical isolates grew in MM with and without NA. (**Fig 2A**). Therefore,  
151 NA auxotrophy does not appear to be a defining characteristic shared by non-toxicogenic resident  
152 intestinal *E. coli*.

153 LF82 is a well-known human-derived AIEC strain that can grow in MM without NA (48) (**Fig.**  
154 **2A-B**). We directly compared the growth kinetics of NC101 and LF82 in MM with and without  
155 NA (**Fig. 2B**). While early growth of LF82 in MM was minimally enhanced by NA, this  
156 difference was indistinguishable by 6hr (**Fig. 2B**). Thus, the prototypic AIEC strain LF82 does  
157 not exhibit NA auxotrophy. Combined with our findings in Fig. 2A, we conclude that NA  
158 auxotrophy is not an AIEC-defining feature.

#### 159 **NC101 has a defect in the *de novo* NAD biosynthesis pathway**

160 NA is a precursor for NAD biosynthesis (41). NAD is an electron carrier and an essential  
161 cofactor for bacterial metabolism (41). In *E. coli* and related bacteria, NAD can be synthesized  
162 *de novo* from L-aspartate (L-asp) through the generation of quinolinic acid (quinolinate, Qa). In  
163 this process, Quinolinate synthase A and B (encoded by *nadA* and *nadB*, respectively) catalyze  
164 the oxidation of L-asp to iminoaspartate and condensation with dihydroxyacetone phosphate to  
165 generate quinolinate (41). Quinolinate is converted to nicotinic mononucleotide (NaMN) by a  
166 *nadC* encoded enzyme and ultimately NAD via enzymes encoded by *nadD* and *nadE* (41). NAD  
167 biosynthesis can also occur through salvage pathways that utilize vitamin precursors like NA or  
168 nicotinamide (Nm) (41, 43, 49) (**Fig. 3A**).

169 Since NA restored the growth of NC101, we predicted that NC101 had a defect within the NAD  
170 biosynthesis pathway. To determine whether this was the case, we assessed NC101 growth in



171 MM supplemented with key NAD biosynthesis intermediates: L-asp, Qa, Nm, NA, and NAD. L-  
172 asp failed to consistently sustain NC101 growth in MM. Conversely, Qa sustained NC101  
173 growth in MM and Nm, NA, and NAD significantly restored growth across all timepoints (**Fig.**  
174 **3B**). Growth curves revealed the kinetics of enhanced NC101 growth in the presence of the  
175 restorative NAD biosynthesis intermediates: Qa, Nm, Na, and NAD (**Fig. 3C**). When examining  
176 the NAD biosynthesis pathway, this indicated that NC101 likely had a defect in the NAD  
177 biosynthesis genes *nadA* or *nadB* (**Fig. 3A**)

### 178 **NA auxotrophy in NC101 is linked to a mutation in NAD biosynthesis gene *nadA***

179 After our growth supplementation assays revealed a likely defect in *nadA* or *nadB*, we sought to  
180 identify the genetic factor(s) responsible for NA auxotrophy in NC101. We performed whole  
181 genome sequencing on wild-type (WT) NC101 and compared the sequence to prototrophic *E.*  
182 *coli*, LF82 and K12. Sequencing revealed that WT NC101 has a missense mutation in *nadA*  
183 (T263G) that was associated with auxotrophy (**Fig. 4A**).

184 To further validate the genetic determinants of NC101 NA auxotrophy, we generated a  
185 prototrophic strain by passaging WT NC101 on MM agar plates in the absence of NA (42).  
186 Sequencing of a selected spontaneous prototrophic revertant, termed NA<sub>Derivative</sub> or NA<sub>D</sub> NC101,  
187 revealed that NA<sub>D</sub> NC101 had a single nucleotide substitution in *nadA* (G263T, compared to  
188 WT) that matched the prototrophic *E. coli* strains LF82 and K12 (**Fig. 4A**). It is important to note  
189 that NA<sub>D</sub> NC101 also had a silent mutation in an intergenic region that was absent from WT  
190 NC101, but we predict this mutation had no impact on NA<sub>D</sub> NC101 prototrophy (Accession  
191 #SAMN16810912) (**Table 2**). To support that NA auxotrophy is due to the observed *nadA*  
192 mutation, our whole genome sequencing revealed that two other NC101 spontaneous

193 prototrophic revertants had missense mutations in *nadA* – one of which shared the same *nadA*  
194 (G263T, compared to WT) nucleotide substitution as NA<sub>D</sub> NC101 (Accession #SAMN16810913  
195 and #SAMN16810914) (**Table 2**).

196 To confirm that the NA<sub>D</sub> revertant restored prototrophy, we grew WT NC101 and NA<sub>D</sub> in MM  
197 with and without NA. NA<sub>D</sub> grew significantly better in MM versus WT NC101 at 24hr (**Fig.**  
198 **4B**). Growth of NA<sub>D</sub> in the absence of NA was the equivalent to WT grown with added NA, as  
199 noted by overlapping growth curves (**Fig. 4B**). The addition of NA did not significantly enhance  
200 NA<sub>D</sub> growth in MM, suggesting NA auxotrophy was successfully eliminated in this strain (**Fig.**  
201 **4B**). These findings are consistent with the literature, which indicates NadA is important for  
202 NAD biosynthesis and mutations in *nadA* can drive NA auxotrophy in *E. coli*, *Shigella spp.*, and  
203 *Salmonella spp.* (41, 43, 44, 50). Therefore, our data support that NC101 NA auxotrophy is due  
204 to a mutation in *nadA*.

#### 205 **Correcting NA auxotrophy in NC101 has negligible impact on bacterial motility or AIEC-** 206 **associated survival in macrophages**

207 To determine if correcting NA auxotrophy impacted AIEC physiology and interactions with  
208 mammalian cells, we assessed WT and NA<sub>D</sub> NC101 for motility and survival in macrophages.  
209 Motility is not an AIEC-defining feature, but hypermotility has recently been linked to changes  
210 in AIEC:host interactions (19, 51). Due to the WT NA auxotrophy, motility was only assessed on  
211 MM agar plates supplemented with NA. There was no significant difference in motility between  
212 WT and NA<sub>D</sub> NC101 in the presence of NA (**Fig. 5A**). However, the motility of both WT and  
213 NA<sub>D</sub> NC101 differed significantly from the non-motile control mutant, NC101 *AfliC* (flagellar  
214 filament structural protein) (51) (**Fig. 5A**).

215 A key feature of AIEC is enhanced survival in macrophages, a characteristic linked to their pro-  
216 inflammatory activities (26, 52). To evaluate whether the identified *nadA* mutation impacted  
217 AIEC-defining survival in macrophages, WT and NA<sub>D</sub> NC101 were subcultured in MM with and  
218 without NA and used to infect macrophage cell cultures, which were also maintained in the  
219 presence or absence of NA. Despite the expected differences in culture densities between WT  
220 and NA<sub>D</sub> strains upon subculturing in MM without NA (**Fig. 1C**), we could obtain a sufficient  
221 amount of WT NC101 to infect with an equivalent multiplicity of infection for all experiments.  
222 Baseline macrophage cell culture media contains an excess of NA, so as expected, there were not  
223 WT NC101 survival defects in the infection assay. Importantly, we found there were no  
224 significant differences in AIEC intramacrophage uptake (1hr) or survival (24hr) between WT  
225 and NA<sub>D</sub> NC101 in the presence or absence of NA supplementation (**Fig 5B-D**). Therefore,  
226 eliminating NA auxotrophy in NA<sub>D</sub> NC101 had negligible impact on these AIEC-associated  
227 functions.

228

## 229 **Discussion**

230 *E. coli* are common members of the mammalian microbiota (15, 16). Many *E. coli* isolates are  
231 prototrophic (41). However, a study identified that NA auxotrophy was common among the B2  
232 phylotype of *E. coli* strains that are usual intestinal inhabitants (41). Herein, we illustrate that the  
233 AIEC strain NC101 (phylotype B2) is an NA auxotroph due to a missense mutation in NAD  
234 biosynthesis gene *nadA*. These findings are significant, as NC101 is an established AIEC often  
235 used for studies on IBD and CRC; yet, NA auxotrophy in NC101 has not been defined (14, 17,  
236 18, 24, 31–33).

237 It is unclear why NC101 possesses NA auxotrophy versus the human-derived resident *E. coli* we  
238 examined (**Fig. 2**). Perhaps some feature of the murine intestinal environment promoted this  
239 NC101 characteristic. Genome reduction or loss-of-function mutations may facilitate adaptation  
240 to the intestinal microenvironment, as the decrease in biosynthetic cost of compounds likely  
241 provides an advantage when key nutrients are consistently present within an environment (53,  
242 54). It is possible that loss of NAD biosynthesis gene function represents a way in which AIEC  
243 NC101 adapted to survive within the murine host. For example, an abundance of NA in the  
244 murine diet may have permitted murine-adapted NC101 with a mutation in *nadA* to persist in the  
245 gut, despite NA auxotrophy. It is also possible that among the many stochastic mutations  
246 experienced by *E. coli* strains, this *nadA* mutation simply conferred no benefit or detriment,  
247 allowing it to persist as a resident microbe of the murine gastrointestinal tract.

248 Besides reducing biosynthetic cost, Na/NAD play a key role in virulence and signaling across  
249 various microbial species, including *E. coli*, *Shigella spp.*, *Candida glabrata*, *Bordetella*  
250 *pertussis*, and *Legionella pneumophila* (41–44, 55–58) In *E. coli*, NA can regulate the  
251 EvgA/EvgS two-component regulatory system that drives multidrug resistance and acid  
252 tolerance (56, 59). While in *Shigella spp.*, a pathogen but close relative of nonpathogenic *E. coli*,  
253 loss of functional NAD biosynthesis genes (often *nadA* and/or *nadB*) reduces *Shigella* virulence  
254 and alters interactions with host cells (44, 55). However, our results demonstrate that NA  
255 auxotrophy does not impact a pro-inflammatory and key defining feature of AIEC, survival in  
256 macrophages.

257 The intestinal microbiota comprises a large/diverse collection of host-associated microbes,  
258 microbial genes, and products (6). Our lab and others have been interested in pro-inflammatory  
259 and pro-carcinogenic molecules derived from intestinal bacteria, namely yersiniabactin and

260 colibactin (17, 18). Many host-influencing microbial-derived molecules, often termed specialized  
261 metabolites, are produced by sophisticated multi-enzymatic machinery encoded by bacterial  
262 biosynthetic gene clusters. By nature, many of these specialized metabolites are difficult to  
263 isolate and purify in sufficient amounts for functional analysis. However, their production can  
264 often be activated by nutrient deficiency (12, 39, 60). Therefore, studies on specialized  
265 metabolites and their interactions with host cells often requires precise nutrient manipulation to  
266 study *in vitro*. To optimize the production of these unique bioactive molecules and reduce non-  
267 essential media components that complicate purification, we have identified the minimal media  
268 components necessary to grow the model AIEC NC101 and generated an NC101 strain no longer  
269 restricted by NA auxotrophy. This strain, NC101 NA<sub>D</sub>, can easily be cultured in MM for  
270 functional studies or used to purify AIEC specialized metabolites. Ultimately this strain, NA<sub>D</sub>  
271 NC101, can now serve as a research tool to investigate how precise nutrient manipulation  
272 impacts AIEC behavior under minimal media conditions.

273 In summary, our work in defining and correcting the NA auxotrophy in AIEC NC101 will 1)  
274 enable precise nutrient manipulation for *in vitro* studies on AIEC as they relate to IBD and CRC,  
275 2) inform culture-based methods to evaluate the function of other auxotrophic gut microbiota  
276 members and their metabolites, and 3) facilitate small molecule isolation and purification from  
277 the pro-inflammatory and pro-carcinogenic strain NC101. Long-term, we expect our findings  
278 will contribute to the identification of microbiota-derived prognostic and therapeutic targets for  
279 human digestive diseases.

280

281 **Materials and Methods**

282 **Bacterial strains:** Descriptions of *E. coli* strains used in this study are listed in **Table 1**. NC101

283  $\Delta$ *fliC* was generated using the  $\lambda$ -red recombinase method, as previously described (17, 61).

284 Primers used for  $\Delta$ *fliC* generation are listed in **Table 3**.

285

## 286 **Media composition**

287 **M9 minimal-defined media (MM) – 5X M9 salts:** 64g Na<sub>2</sub>HPO<sub>4</sub>\*7H<sub>2</sub>O, 15g anhydrous  
288 KH<sub>2</sub>PO<sub>4</sub>, 2.5g NaCl, and 5g NH<sub>4</sub>Cl brought to 1L in diH<sub>2</sub>O (62). **Complete MM:** 0.1mM  
289 CaCl<sub>2</sub>, 1X M9 salts, 2mM MgSO<sub>4</sub>, 0.4% glycerol, and 0.2% casamino acids (CAA, Sigma  
290 #2240) brought to 1L in diH<sub>2</sub>O. Where indicated, the following were added at these final  
291 concentrations: nicotinic acid (NA, Sigma #N4126), 50 $\mu$ g/L; L-aspartate (L-asp),  
292 200mg/L; nicotinamide (Nm), 50 $\mu$ g/L; and NAD, 1 $\mu$ g/L.

293

294 **Vitamin mix (VM), 100X stock:** 2mg folic acid, 10mg pyridoxine hydrochloride, 5mg  
295 riboflavin, 2mg biotin, 5mg thiamine, 5mg nicotinic acid, 5mg calcium pantothenate,  
296 0.1mg vitamin B12, 5mg p-aminobenzoic acid, 5mg thioctic acid, and 900mg  
297 monopotassium phosphate brought to 1L in diH<sub>2</sub>O and aliquoted into 10mL stocks. One  
298 10mL stock was used per liter of media. Formulation is from ATCC and is based on  
299 Wolfe's Vitamin solution (ATCC® MD-VS™).

300

301 **Overnight cultures:** Bacterial strains were preserved at -80°C and grown overnight at 37°C on  
302 Luria Bertani (LB, Fisher Sc. #BP9722-2) agar plates. Isolated colonies were transferred to MM  
303 and grown overnight (>15hrs) at 37°C with shaking at 220 rpm.

304

305 **Growth assays:** Overnight cultures were centrifuged and washed three times with 1X phosphate  
306 buffered saline (PBS), to remove any trace compounds contained in the culture. Cells were re-  
307 suspended and normalized by optical density (OD<sub>600</sub>) in test media. Cultures were grown at 37°C  
308 with shaking at 220 rpm. For passaging assays, OD<sub>600</sub> was recorded at the indicated timepoints  
309 (2hr, 4hr, 8hr or 24hr). For growth curves, OD<sub>600</sub> was recorded every 45min for 6hr and a final  
310 timepoint was recorded at 24hr.

311

312 **Spontaneous prototrophic revertant generation:** WT NC101 was grown overnight in MM +  
313 NA, 5mL of the culture was centrifuged, and the supernatant discarded. The cell pellet was  
314 washed twice with 1X PBS and resuspended in 500µL 1X PBS. A 100 µl spot was spread onto  
315 each of five MM agar plates without NA. Plates were incubated at 37°C and monitored for  
316 growth of revertant colonies (42). Colonies were grown on MM without NA to confirm  
317 prototrophy and isolates were preserved at -80°C. Whole genome sequencing was performed to  
318 determine the location and nature of the mutation(s) leading to reversion. The revertant used in  
319 these studies was termed NC101 NA<sub>Derivative</sub> (NA<sub>D</sub>).

320

321 **NC101 genome assembly:** A complete NC101 genome was assembled from nanopore sequence  
322 using Minimap2 and Miniasm (63). The assembly was circularized and polished four times with  
323 Racon (64) followed by once with Medaka (Oxford Nanopore Technologies,  
324 <https://github.com/nanoporetech/medaka>). Matched Illumina sequence data was used to polish  
325 the resulting assembly using FMLRC (65) with parameters “-k 21 -K 30 -m 3 -f 0.05 -B 10”. The  
326 final polished genome was rotated and linearized such that it starts at the origin of replication.

327

328 **Whole genome sequencing:** Three spontaneous prototrophic revertants, including NA<sub>D</sub>, were  
329 sent for whole genome sequencing. Samples were sent to the Microbial  
330 Genome Sequencing Center (MiGS), formerly at the University of Pittsburgh, for genomic DNA  
331 extraction and Illumina 2x150 paired end sequencing on the NextSeq 550  
332 platform. Sequencing reads were mapped to our closed NC101 genome using CLC Genomic  
333 Workbench7.5.1 with average coverage of 85x for JA0257, 62x for JA0265, and 75x for  
334 JA0266. Sequences for LF82 (NC\_011993.1) and K12 (NC\_000913.3) were obtained from the  
335 National Center for Biotechnology Information (NCBI) and all alignments were analyzed via  
336 Geneious Prime version 2020.1.2. Assembled sequences from this study were deposited in NCBI  
337 and repository information is listed in **Table 2**.

338

339 **Motility:** Isolates were grown overnight, as described above. A 1 $\mu$ L spot was used to inoculate  
340 the center of MM soft agar plates (MM + 0.25% agar) with NA. Plates were incubated at 37°C  
341 for 8hr and the diameters of motility swarms were measured.

342

343 **Macrophage survival assays:** Bacterial intramacrophage survival was measured using the  
344 standard gentamicin protection assay for AIEC bacteria (26, 28). The J774A.1 murine  
345 macrophage-like cell line was used as a model and maintained according to ATCC standards in  
346 DMEM + 10% heat-inactivated FBS (DMEM, Gibco #11995-065). J774A.1 cells were seeded at  
347 2x10<sup>5</sup> cells/mL in 1mL media into 24-well plates (Falcon #353047) and grown overnight. The  
348 next day, bacterial overnight cultures were subcultured in MM with and without NA for 3hr.  
349 Before infection, J774A.1 monolayers were washed twice with 1X PBS. Then, subcultured  
350 bacteria were added at a multiplicity of infection (MOI) = 10 in cell culture media with and



351 without NA. Plates were spun at  $180 \times g$  for 5min. Prepared bacterial cultures were serial diluted  
352 and plated on LB agar plates to validate infection dose.

353

354 After a 30min incubation at  $37^{\circ}\text{C}$  with 5%  $\text{CO}_2$ , infected cultures were washed twice with 1X  
355 PBS and gentamicin-laden media was added ( $100\mu\text{g}/\text{mL}$  gentamicin for 1hr timepoint and  
356  $20\mu\text{g}/\text{mL}$  for 24hr in DMEM + 10% FBS with and without NA). At 1hr and 24hr, cells were  
357 washed twice with 1X PBS and  $500\mu\text{L}$  of 1% Triton X-100 in  $\text{dH}_2\text{O}$  was added to each well for  
358 5min. Samples were mixed, serial diluted, and plated on LB agar plates to determine viable  
359 colony forming units (CFU). Percent intracellular bacteria =  $[(\text{CFU}/\text{mL at 24hr})/(\text{CFU}/\text{mL at}$   
360  $1\text{hr})] \times 100$ .

361

362 **Statistics:** Statistical analysis was performed using Prism version 9.0.0 (GraphPad software San  
363 Diego, CA). A Welch's t test was used when two experimental groups were compared and a one-  
364 way ANOVA with Dunnett's T3 multiple comparisons test was used when 3 or more  
365 experimental groups were compared. Differences with a p-value less than 0.05 were considered  
366 significant. All experiments included at least 3 biological replicates with 1-2 technical replicates  
367 each, per timepoint.

368

369 **Data availability:** Assembled sequences from our whole genome sequencing, above, were  
370 deposited in NCBI and repository information is listed in **Table 2**.

371

372 **Acknowledgments**

373 We thank the following colleagues for kindly gifting *E. coli* strains: R. Balfour Sartor, University  
374 of North Carolina (UNC) at Chapel Hill (*E. coli* NC101, LF82, and K12 MG1655); Kenneth W.  
375 Simpson, Cornell University (*E. coli* 42ET-1, 568-3, 37RT-2, 532-9, and 39ES-1); Leslie M.  
376 Hicks, UNC at Chapel Hill (*E. coli* 25922); Barry J. Campbell, University of Liverpool (*E. coli*  
377 HM670); Melissa Ellermann, University of South Carolina at Columbia (NC101  $\Delta$ *fliC*). We  
378 thank Dr. Kimberly Walker for critical reading of the manuscript. NC101 genome assembly was  
379 supported by Jeremy Wang NIH K01DK119582 (JW). The remaining body of this work was  
380 supported by funding from NIH R01DK124617 (JCA), pilot funding from NIH P30DK034987  
381 (subcontract JCA), and a UNC Lineberger Comprehensive Cancer Center Innovation Award  
382 (JCA).

383

#### 384 **References**

- 385 1. Dahlhamer JM, Zammitti EP, Ward BW, Wheaton AG, Croft JB. 2016. Prevalence of  
386 inflammatory bowel disease among adults aged  $\geq 18$  years — United States, 2015.  
387 MMWR Morb Mortal Wkly Rep 65:1166–1169.
- 388 2. Kaplan GG. 2015. The global burden of IBD: From 2015 to 2025. Nat Rev Gastroenterol  
389 Hepatol 12:720–727.
- 390 3. Khor B, Gardet A, Xavier RJ. 2011. Genetics and pathogenesis of inflammatory bowel  
391 disease. Nature 474:307–317.
- 392 4. Rieder F, Brenmoehl J, Leeb S, Schölmerich J, Rogler G. 2007. Wound healing and  
393 fibrosis in intestinal disease. Gut 56:130–139.
- 394 5. Nadeem MS, Kumar V, Al-Abbasi FA, Kamal MA, Anwar F. 2019. Risk of colorectal  
395 cancer in inflammatory bowel diseases. Semin Cancer Biol 64:51–60.

- 396 6. Lopez LR, Bleich RM, Arthur JC. 2021. Microbiota effects on carcinogenesis: Initiation,  
397 promotion and progression. *Annu Rev Med* 72:1–19.
- 398 7. Schirmer M, Garner A, Vlamakis H, Xavier RJ. 2019. Microbial genes and pathways  
399 in inflammatory bowel disease. *Nat Rev Microbiol* 17:497–511.
- 400 8. Sartor RB. 2006. Mechanisms of disease: Pathogenesis of Crohn’s disease and ulcerative  
401 colitis. *Nat Clin Pract Gastroenterol Hepatol* 3:390–407.
- 402 9. Goethel A, Croitoru K, Philpott DJ. 2018. The interplay between microbes and the  
403 immune response in inflammatory bowel disease. *J Physiol* 596:3869–3882.
- 404 10. Caruso R, Lo BC, Núñez G. 2020. Host–microbiota interactions in inflammatory bowel  
405 disease. *Nat Rev Immunol* 20:411–426.
- 406 11. Sartor RB. 2008. Microbial influences in inflammatory bowel diseases. *Gastroenterology*  
407 134:577–594.
- 408 12. Bäumlér AJ, Sperandio V. 2016. Interactions between the microbiota and pathogenic  
409 bacteria in the gut. *Nature* 535:85–93.
- 410 13. Hughes ER, Winter MG, Duerkop BA, Spiga L, Furtado de Carvalho T, Zhu W, Gillis  
411 CC, Buttner L, Smoot MP, Behrendt CL, Cherry S, Santos RL, Hooper L V., Winter SE.  
412 2017. Microbial respiration and formate oxidation as metabolic signatures of  
413 inflammation-associated dysbiosis. *Cell Host Microbe* 21:208–219.
- 414 14. Dogan B, Suzuki H, Herlekar D, Sartor BRB, Campbell BJ, Roberts CL, Stewart K,  
415 Scherl EJ, Araz Y, Bitar PP, Lefébure T, Chandler B, Schukken YH, Stanhope MJ,  
416 Simpson KW. 2014. Inflammation-associated adherent-invasive escherichia coli are  
417 enriched in pathways for use of propanediol and iron and M-cell translocation. *Inflamm*  
418 *Bowel Dis* 20:1919–1932.

- 419 15. Mirsepasi-Lauridsen HC, Vallance BA, Krogfelt KA, Petersen AM. 2019. *Escherichia*  
420 *coli* pathobionts associated with inflammatory bowel disease. *Clin Microbiol Rev* 32:1–  
421 16.
- 422 16. Tenaillon O, Skurnik D, Picard B, Denamur E. 2010. The population genetics of  
423 commensal *Escherichia coli*. *Nat Rev Microbiol* 8:207–217.
- 424 17. Ellermann M, Gharaibeh RZ, Fulbright L, Dogan B, Moore LN, Broberg CA, Lopez LR,  
425 Rothemich AM, Herzog JW, Rogala A, Gordon IO, Rieder F, Brouwer CR, Simpson KW,  
426 Jobin C, Sartor RB, Arthur JC. 2019. Yersiniabactin-producing adherent/invasive  
427 *Escherichia coli* promotes inflammation-associated fibrosis in gnotobiotic IL-10<sup>-/-</sup> mice.  
428 *Infect Immun* 87:1–18.
- 429 18. Arthur JC, Perez-Chanona E, Mühlbauer M, Tomkovich S, Uronis JM, Fan T-J, Campbell  
430 BJ, Abujamel T, Dogan B, Rogers AB, Rhodes JM, Stintzi A, Simpson KW, Hansen JJ,  
431 Keku TO, Fodor AA, Jobin C. 2012. Intestinal inflammation targets cancer-inducing  
432 activity of the microbiota. *Science* 338:120–123.
- 433 19. Martinez-Medina M, Garcia-Gil LJ. 2014. *Escherichia coli* in chronic inflammatory bowel  
434 diseases: An update on adherent invasive *Escherichia coli* pathogenicity . *World J*  
435 *Gastrointest Pathophysiol* 5:213-227.
- 436 20. Small CLN, Reid-Yu SA, McPhee JB, Coombes BK. 2013. Persistent infection with  
437 Crohn’s disease-associated adherent-invasive *Escherichia coli* leads to chronic  
438 inflammation and intestinal fibrosis. *Nat Commun* 4:1–12.
- 439 21. Carvalho FA, Barnich N, Sauvanet P, Darcha C, Gelot A, Darfeuille-Michaud A. 2008.  
440 Crohn’s disease-associated *Escherichia coli* LF82 aggravates colitis in injured mouse  
441 colon via signaling by flagellin. *Inflamm Bowel Dis* 14:1051–1060.

- 442 22. Carvalho FA, Koren O, Goodrich JK, Johansson MEV, Nalbantoglu I, Aitken JD, Su Y,  
443 Chassaing B, Walters WA, González A, Clemente JC, Cullender TC, Barnich N,  
444 Darfeuille-Michaud A, Vijay-Kumar M, Knight R, Ley RE, Gewirtz AT. 2012. Transient  
445 inability to manage proteobacteria promotes chronic gut inflammation in TLR5-deficient  
446 mice. *Cell Host Microbe* 12:139–152.
- 447 23. Martinez-Medina M, Denizot J, Dreux N, Robin F, Billard E, Bonnet R, Darfeuille-  
448 Michaud A, Barnich N. 2014. Western diet induces dysbiosis with increased E coli in  
449 CEABAC10 mice, alters host barrier function favouring AIEC colonisation. *Gut* 63:116–  
450 124.
- 451 24. Dejea CM, Fathi P, Craig JM, Boleij A, Taddese R, Geis AL, Wu X, DeStefano Shields  
452 CE, Hechenbleikner EM, Huso DL, Anders RA, Giardiello FM, Wick EC, Wang H, Wu  
453 S, Pardoll DM, Housseau F, Sears CL. 2018. Patients with familial adenomatous  
454 polyposis harbor colonic biofilms containing tumorigenic bacteria. *Science* 359:592–597.
- 455 25. Nash JHE, Villegas A, Kropinski AM, Aguilar-Valenzuela R, Konczy P, Mascarenhas M,  
456 Ziebell K, Torres AG, Karmali MA, Coombes BK. 2010. Genome sequence of adherent-  
457 invasive *Escherichia coli* and comparative genomic analysis with other *E. coli* pathotypes.  
458 *BMC Genomics* 11:1–15.
- 459 26. Darfeuille-Michaud A, Boudeau J, Bulois P, Neut C, Glasser AL, Barnich N, Bringer MA,  
460 Swidsinski A, Beaugerie L, Colombel JF. 2004. High prevalence of adherent-invasive  
461 *Escherichia coli* associated with ileal mucosa in Crohn's disease. *Gastroenterology*  
462 127:412–421.
- 463 27. Ellermann M, Gharaibeh RZ, Maharshak N, Pérez-Chanona E, Jobin C, Carroll IM,  
464 Arthur JC, Plevy SE, Fodor AA, Brouwer CR, Sartor RB. 2020. Dietary iron variably

- 465 modulates assembly of the intestinal microbiota in colitis-resistant and colitis-susceptible  
466 mice. *Gut Microbes* 11:32–50.
- 467 28. Ellermann M, Huh EY, Liu B, Carroll IM, Tamayo R, Sartor RB. 2015. Adherent-invasive  
468 *Escherichia coli* production of cellulose influences iron-induced bacterial aggregation,  
469 phagocytosis, and induction of colitis. *Infect Immun* 83:4068–4080.
- 470 29. Delmas J, Gibold L, Faïs T, Batista S, Lereboure M, Sinel C, Vazeille E, Cattoir V,  
471 Buisson A, Barnich N, Dalmaso G, Bonnet R. 2019. Metabolic adaptation of adherent-  
472 invasive *Escherichia coli* to exposure to bile salts. *Sci Rep* 9:1–13.
- 473 30. Ormsby MJ, Johnson SA, Carpena N, Meikle LM, Goldstone RJ, McIntosh A, Wessel  
474 HM, Hulme HE, McConnachie CC, Connolly JPR, Roe AJ, Hasson C, Boyd J, Fitzgerald  
475 E, Gerasimidis K, Morrison D, Hold GL, Hansen R, Walker D, Smith DGE, Wall DM.  
476 2020. Propionic acid promotes the virulent phenotype of Crohn’s disease-associated  
477 adherent-invasive *Escherichia coli*. *Cell Rep* 30:2297–2305.
- 478 31. Gogokhia L, Buhrke K, Bell R, Hoffman B, Brown DG, Hanke-Gogokhia C, Ajami NJ,  
479 Wong MC, Ghazaryan A, Valentine JF, Porter N, Martens E, O’Connell R, Jacob V,  
480 Scherl E, Crawford C, Stephens WZ, Casjens SR, Longman RS, Round JL. 2019.  
481 Expansion of bacteriophages is linked to aggravated intestinal inflammation and colitis.  
482 *Cell Host Microbe* 25:285–299.
- 483 32. Schmitz JM, Tonkonogy SL, Dogan B, Leblond A, Whitehead KJ, Kim SC, Simpson KW,  
484 Sartor RB. 2019. Murine adherent and invasive *E. coli* induces chronic inflammation and  
485 immune responses in the small and large intestines of monoassociated IL-10<sup>-/-</sup> mice  
486 independent of long polar fimbriae adhesin A. *Inflamm Bowel Dis* 25:875–885.
- 487 33. Tchaptchet S, Fan TJ, Goeser L, Schoenborn A, Gulati AS, Sartor RB, Hansen JJ. 2013.

- 488 Inflammation-induced acid tolerance genes *gadAB* in luminal commensal *Escherichia coli*  
489 attenuate experimental colitis. *Infect Immun* 81:3662–3671.
- 490 34. Kim SC, Tonkonogy SL, Albright CA, Tsang J, Balish EJ, Braun J, Huycke MM, Sartor  
491 RB. 2005. Variable phenotypes of enterocolitis in interleukin 10-deficient mice  
492 monoassociated with two different commensal bacteria. *Gastroenterology* 128:891–906.
- 493 35. Arthur JC, Gharaibeh RZ, Mühlbauer M, Perez-Chanona E, Uronis JM, McCafferty J,  
494 Fodor AA, Jobin C. 2014. Microbial genomic analysis reveals the essential role of  
495 inflammation in bacteria-induced colorectal cancer. *Nat Commun* 5:1–11.
- 496 36. Patwa LG, Fan TJ, Tchaptchet S, Liu Y, Lussier YA, Sartor RB, Hansen JJ. 2011. Chronic  
497 intestinal inflammation induces stress-response genes in commensal *Escherichia coli*.  
498 *Gastroenterology* 141:1842–1851.
- 499 37. Perry RD, Fetherston JD. 2011. Yersiniabactin iron uptake: mechanisms and role in  
500 *Yersinia pestis* pathogenesis. *Microbes Infect* 13:808–817.
- 501 38. Tronnet S, Garcie C, Rehm N, Dobrindt U, Oswald E, Martin P. 2016. Iron homeostasis  
502 regulates the genotoxicity of *Escherichia coli* that produces colibactin. *Infect Immun*  
503 84:3358–3368.
- 504 39. Sharon G, Garg N, Debelius J, Knight R, Dorrestein PC, Mazmanian SK. 2014.  
505 Specialized metabolites from the microbiome in health and disease. *Cell Metab* 20:719–  
506 730.
- 507 40. Baumgart M, Dogan B, Rishniw M, Weitzman G, Bosworth B, Yantiss R, Orsi RH,  
508 Wiedmann M, McDonough P, Kim SG, Berg D, Schukken Y, Scherl E, Simpson KW.  
509 2007. Culture independent analysis of ileal mucosa reveals a selective increase in invasive  
510 *Escherichia coli* of novel phylogeny relative to depletion of Clostridiales in Crohn’s

- 511 disease involving the ileum. *ISME J* 1:403–418.
- 512 41. Bouvet O, Bourdelier E, Glodt J, Clermont O, Denamur E. 2017. Diversity of the  
513 auxotrophic requirements in natural isolates of *Escherichia coli*. *Microbiology* 163:891–  
514 899.
- 515 42. Li Z, Bouckaert J, Deboeck F, de Greve H, Hernalsteens JP. 2012. Nicotinamide  
516 dependence of uropathogenic *Escherichia coli* UTI89 and application of *nadB* as a neutral  
517 insertion site. *Microbiology* 158:736–745.
- 518 43. Di Martino ML, Fioravanti R, Barbabella G, Prosseda G, Colonna B, Casalino M. 2013.  
519 Molecular evolution of the nicotinic acid requirement within the *Shigella*/EIEC pathotype.  
520 *Int J Med Microbiol* 303:651–661.
- 521 44. Prunier AL, Schuch R, Fernández RE, Maurelli AT. 2007. Genetic structure of the *nadA*  
522 and *nadB* antivirulence loci in *Shigella* spp. *J Bacteriol* 189:6482–6486.
- 523 45. Ahmed ZU, Sarker MR, Sack DA. 1988. Nutritional requirements of *Shigellae* for growth  
524 in a minimal medium. *Infect Immun* 56:1007–1009.
- 525 46. Agus A, Planchais J, Sokol H. 2018. Gut microbiota regulation of tryptophan metabolism  
526 in health and disease. *Cell Host Microbe* 23:716–724.
- 527 47. Martin HM, Campbell BJ, Hart CA, Mpofu C, Nayar M, Singh R, Englyst H, Williams  
528 HF, Rhodes JM. 2004. Enhanced *Escherichia coli* adherence and invasion in Crohn's  
529 disease and colon cancer. *Gastroenterology* 127:80–93.
- 530 48. Darfeuille-Michaud A, Neut C, Barnich N, Lederman E, Di Martino P, Desreumaux P,  
531 Gambiez L, Joly B, Cortot A, Colombel JF. 1998. Presence of adherent *Escherichia coli*  
532 strains in ileal mucosa of patients with Crohn's disease. *Gastroenterology* 115:1405–1413.
- 533 49. Liu G, Foster J, Manlapaz-Ramos P, Olivera BM. 1982. Nucleoside salvage pathway for



- 534 NAD biosynthesis in *Salmonella typhimurium*. *J Bacteriol* 152:1111–1116.
- 535 50. Bergthorsson U, Roth JR. 2005. Natural isolates of *Salmonella enterica* serovar Dublin  
536 carry a single *nadA* missense mutation. *J Bacteriol* 187:400–403.
- 537 51. Elhenawy W, Tsai CN, Coombes BK. 2019. Host-specific adaptive diversification of  
538 Crohn’s disease-associated adherent-invasive *Escherichia coli*. *Cell Host Microbe* 25:301-  
539 312.
- 540 52. Kittana H, Gomes-Neto JC, Heck K, Sughroue J, Xian Y, Mantz S, Segura Muñoz RR,  
541 Cody LA, Schmaltz RJ, Anderson CL, Moxley RA, Hostetter JM, Fernando SC, Clarke J,  
542 Kachman SD, Cressler CE, Benson AK, Walter J, Ramer-Tait AE. 2019. Establishing the  
543 phenotypic basis of adherent-invasive *Escherichia coli* (AIEC) pathogenicity in intestinal  
544 inflammation. *bioRxiv* <https://doi.org/10.1101/772012>.
- 545 53. Nayfach S, Shi ZJ, Seshadri R, Pollard KS, Kyrpides NC. 2019. New insights from  
546 uncultivated genomes of the global human gut microbiome. *Nature* 568:505–510.
- 547 54. Moran NA. 2002. Microbial minimalism: Genome reduction in bacterial pathogens. *Cell*  
548 108:583–586.
- 549 55. Prunier AL, Schuch R, Fernández RE, Kohler H, McCormick BA, Maurelli AT. 2007.  
550 *nadA* and *nadB* of *Shigella flexneri* 5a are antivirulence loci responsible for the synthesis  
551 of quinolinate, a small molecule inhibitor of *Shigella* pathogenicity. *Microbiology*  
552 153:2363–2372.
- 553 56. Edwards RL, Bryan A, Jules M, Harada K, Buchrieser C, Swanson MS. 2013. Nicotinic  
554 acid modulates *Legionella pneumophila* gene expression and induces virulence traits.  
555 *Infect Immun* 81:945–955.
- 556 57. Cannizzo ES, Clement CC, Sahu R, Follo C. 2011. Oxidative stress, inflam-aging and

- 557 immunosenescence. *J Proteomics* 74:2313–2323.
- 558 58. Domergue R, Castano I, De Las Penas A, Zupancic M, Locketell V, Hebel JR, Johnson D,  
559 Cormack BP. 2005. Nicotinic acid limitation regulates silencing of *Candida* adhesins  
560 during UTI. *Science* 308:866–870.
- 561 59. Utsumi R, Katayama S, Taniguchi M, Horie T, Ikeda M, Igaki S, Nakagawa H, Miwa A,  
562 Tanabe H, Noda M. 1994. Newly identified genes involved in the signal transduction of  
563 *Escherichia coli* K-12. *Gene* 140:73–77.
- 564 60. Hood MI, Skaar EP. 2012. Nutritional immunity: Transition metals at the pathogen-host  
565 interface. *Nat Rev Microbiol* 10:525–537.
- 566 61. Datsenko KA, Wanner BL. 2000. One-step inactivation of chromosomal genes in  
567 *Escherichia coli* K-12 using PCR products. *Proc Natl Acad Sci U S A* 97:6640–6645.
- 568 62. Sambrook J, Russell DW. 2006. *The condensed protocols from molecular cloning : a*  
569 *laboratory manual*.718.
- 570 63. Li H. 2016. Minimap and miniasm: Fast mapping and de novo assembly for noisy long  
571 sequences. *Bioinformatics* 32:2103–2110.
- 572 64. Vaser R, Sović I, Nagarajan N, Šikić M. 2017. Fast and accurate de novo genome  
573 assembly from long uncorrected reads. *Genome Res* 27:737–746.
- 574 65. Wang JR, Holt J, McMillan L, Jones CD. 2018. FMLRC: Hybrid long read error  
575 correction using an FM-index. *BMC Bioinformatics* 19:1–11.

576

## 577 **Figure legends**

578 **Fig. 1. Nicotinic acid restores growth of *E. coli* NC101 in minimal media.** (A) Wild-type  
579 NC101 was grown in Luria-Bertani (LB) broth, minimal media (MM), or MM + vitamin mix

580 (VM). Growth was measured at 8hr and 24hr by culture optical density, OD<sub>600</sub>. (B) NC101 was  
581 grown in LB, MM, MM + VM, or MM supplemented with individual or combinations of  
582 vitamins and tryptophan. OD<sub>600</sub> was assessed at 8hr and 24hr. (C) Growth curve of NC101 in  
583 LB, MM, or MM + NA. (A, B) Bars (n = 3) or (C) points (n = 4) depict mean +/- SEM.  
584 Significance (\*) is shown compared to NC101 growth in MM at (A,B) each timepoint or (C)  
585 24hr and was determined at p < 0.05, using a one-way ANOVA with Dunnett's T3 multiple  
586 comparisons test.

587  
588 **Fig. 2. NA auxotrophy is not common among non-toxicogenic *E. coli* strains, including**  
589 **prototypic AIEC LF82.** (A) AIEC and non-AIEC *E. coli* isolates, were grown in minimal media  
590 (MM) with and without nicotinic acid (NA). Growth was evaluated at 2hr, 4hr, 8hr, and 24hr by  
591 OD<sub>600</sub>. (B) Growth curve of wild-type NC101 and LF82 (human-derived AIEC) in MM with and  
592 without NA. (A) Bars (n = 3-6) or (B) points (n = 3) depict mean +/- SEM. (A) Strains grown in  
593 MM were compared to NC101 grown in MM, and strains grown in MM + NA were compared to  
594 NC101 grown in MM + NA. Significance (\*) is shown compared at (A) each timepoint or (B)  
595 24hr and was determined at p < 0.05, using a one-way ANOVA with Dunnett's T3 multiple  
596 comparisons test.

597  
598 **Fig. 3. NC101 has a defect in the *de novo* NAD biosynthesis pathway.** (A) Illustration of NAD  
599 biosynthesis pathway in *E. coli*, including pathway intermediates and genes involved.  
600 Intermediates tested in *E. coli* growth assays are indicated by stars (blue restored growth, white  
601 did not). Bolded genes, *nadA* and *nadB*, are predicted to be responsible for NC101 auxotrophy.  
602 (B) Wild-type NC101 was grown in minimal media (MM), MM + vitamin mix (VM), or MM +

603 NAD biosynthesis pathway intermediates: L-aspartate (L-Asp), quinolinic acid (Qa),  
604 nicotinamide (Nm), nicotinic acid (NA), and NAD. Culture density was evaluated at 2hr, 4hr,  
605 8hr, or 24hr by OD<sub>600</sub>. (C) Growth curve of NC101 in MM with or without Qa, Nm, NA, or  
606 NAD. (B) Bars (n = 3-6) or (C) points (n = 3) depict mean +/- SEM. Significance (\*) is shown  
607 compared to NC101 growth in MM at (B) each timepoint or (C) 24hr and was determined at p <  
608 0.05, using a one-way ANOVA with Dunnett's T3 multiple comparisons test.

609

610 **Fig. 4. A missense mutation in NAD biosynthesis gene *nadA* confers NA auxotrophy in**  
611 **NC101. (A)** Genetic alignment of partial *nadA* sequence from NA auxotrophic (Wild-type (WT)  
612 NC101) and prototrophic (NC101 NA<sub>D</sub>, LF82, and K12) *E. coli*. Nucleotide and amino acid  
613 sequences, noted by 1 letter abbreviations, are shown. The ruler displays nucleotide position of  
614 coding sequence. The identity bar displays regions of similarity (black) or dissimilarity (grey or  
615 blue). The highlighted amino acids show the region of noted dissimilarity (*nadA* G263T)  
616 between NA auxotrophic (grey) and prototrophic (blue) *E. coli*. (B) A growth curve of WT  
617 NC101 and prototrophic revertant NC101 strain (NA<sub>D</sub>) in minimal media (MM) with and  
618 without nicotinic acid (NA). Growth was measured by culture optical density, OD<sub>600</sub>. Points  
619 depict mean +/- SEM (n = 4). Significance (\*) is shown compared to NC101 growth in MM at  
620 24hr and was determined at p < 0.05, using a one-way ANOVA with Dunnett's T3 multiple  
621 comparisons test.

622

623 **Fig. 5. Correcting NA auxotrophy in NC101 has minimal impact on *in vitro* AIEC function.**

624 (A) Wild-type (WT) NC101, prototrophic NC101 NA<sub>D</sub>, and non-motile control NC101  $\Delta$ *fliC*

625 were grown on minimal media (MM) soft agar plates with nicotinic acid (NA). Diameter of  
626 motility swarm spots (mm) were measured at 8hr (n = 3-5). **(B-D)** J774A.1 murine macrophages  
627 were infected at a multiplicity of infection (MOI) = 10 with WT or NA<sub>D</sub>. Bacterial culture media  
628 before infection (“Bacteria”) or cell culture media during infection (“Macrophage”) were with or  
629 without NA supplementation. Number of bacteria are shown at **(B)** 1hr or **(C)** 24hr post-infection  
630 as Log<sub>10</sub> colony forming units (CFU)/mL. **(D)** Percent survival = [(CFU/mL at 24hr)/(CFU/mL  
631 at 1hr)]×100 (n = 3-4). Bars depict mean +/- SEM. Significance (\*) is shown compared to WT  
632 NC101 and was determined at p < 0.05, using a **(A)** one-way ANOVA with Dunnett’s T3  
633 multiple comparisons test or **(B-D)** Welch’s t test.

634

635

636

637

638

639

640

641

642

643

644

645 **Figures**

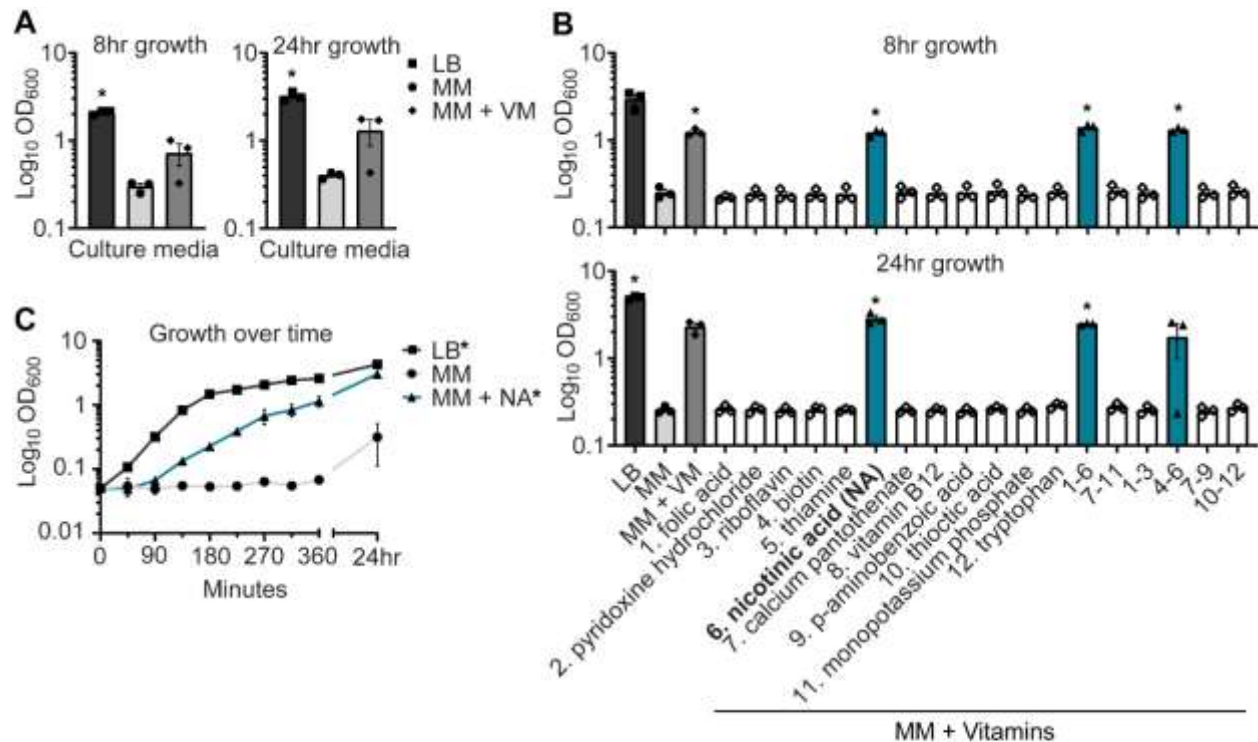

**Fig. 1. Nicotinic acid restores growth of *E. coli* NC101 in minimal media.** (A) Wild-type NC101 was grown in Luria-Bertani (LB) broth, minimal media (MM), or MM + vitamin mix (VM). Growth was measured at 8hr and 24hr by culture optical density, OD<sub>600</sub>. (B) NC101 was grown in LB, MM, MM + VM, or MM supplemented with individual or combinations of vitamins and tryptophan. OD<sub>600</sub> was assessed at 8hr and 24hr. (C) Growth curve of NC101 in LB, MM, or MM + NA. (A, B) Bars (n = 3) or (C) points (n = 4) depict mean +/- SEM. Significance (\*) is shown compared to NC101 growth in MM at (A,B) each timepoint or (C) 24hr and was determined at p < 0.05, using a one-way ANOVA with Dunnett's T3 multiple comparisons test.

646

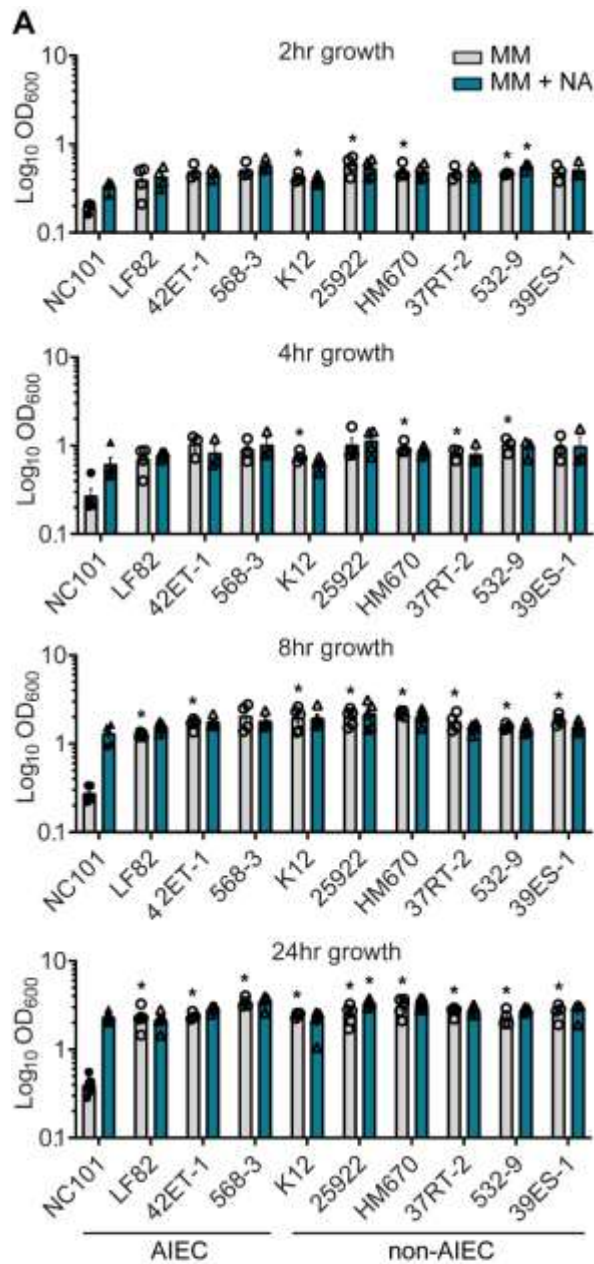

**Fig. 2. NA auxotrophy is not common among non-toxi-genic *E. coli* strains, including prototypic AIEC LF82.** (A) AIEC and non-AIEC *E. coli* isolates, were grown in minimal media (MM) with and without nicotinic acid (NA). Growth was evaluated at 2hr, 4hr, 8hr, and 24hr by OD<sub>600</sub>. (B) Growth curve of wild-type NC101 and LF82 (human-derived AIEC) in MM with and without NA. (A) Bars (n = 3-6) or (B) points (n = 3) depict mean +/- SEM. (A) Strains grown in MM were compared to NC101 grown in MM, and strains grown in MM + NA were compared to NC101 grown in MM + NA. Significance (\*) is shown compared at (A) each timepoint or (B) 24hr and was determined at p < 0.05, using a one-way ANOVA with Dunnett's T3 multiple comparisons test.

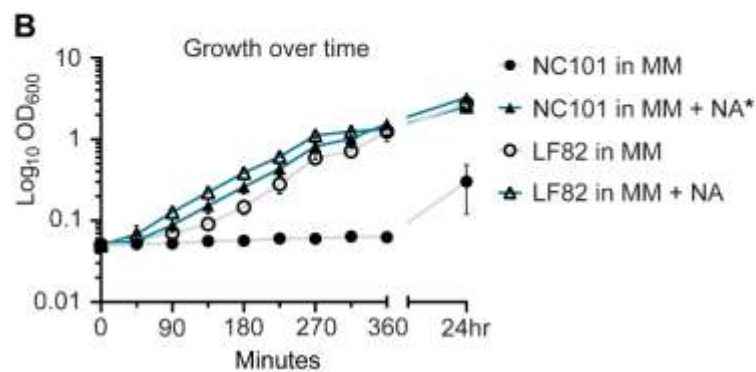

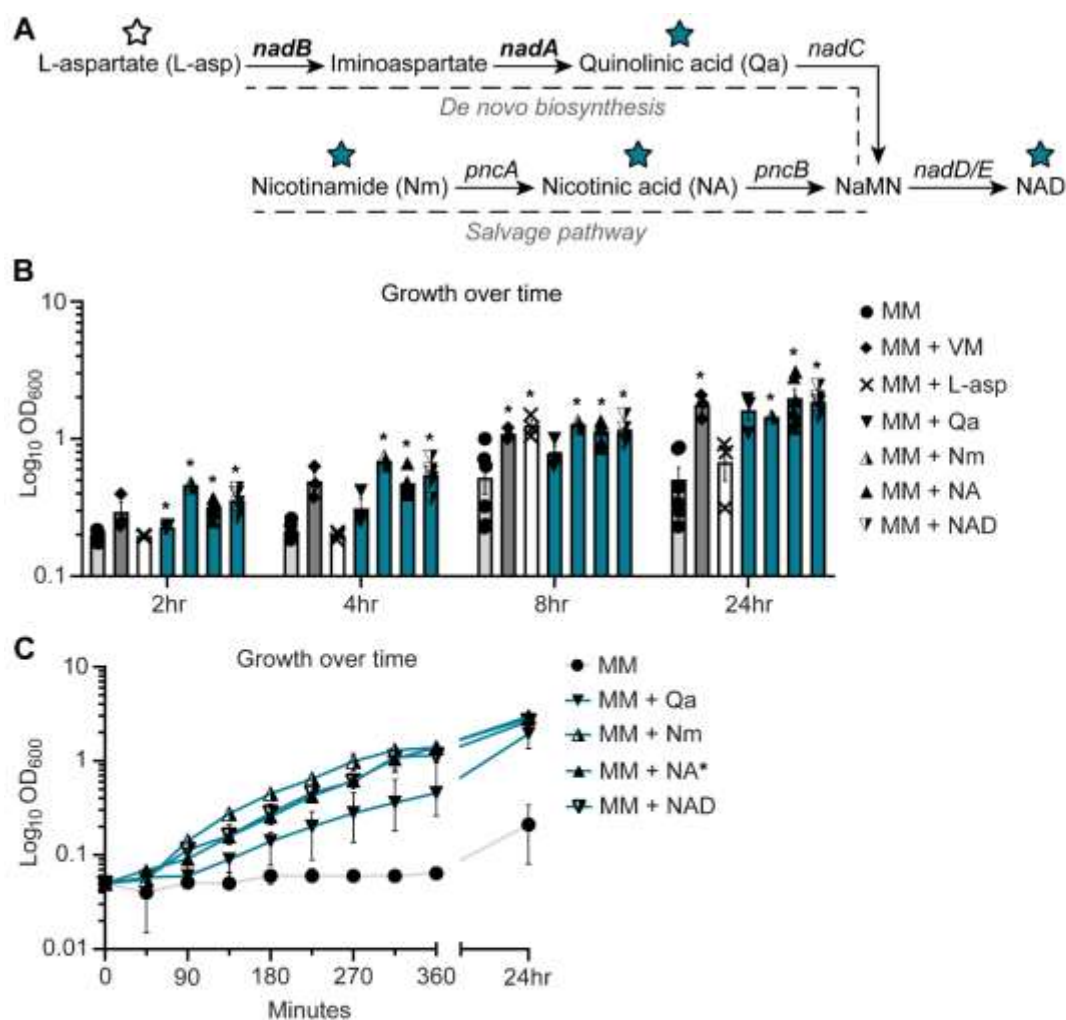

**Fig. 3. NC101 has a defect in the de novo NAD biosynthesis pathway.** (A) Illustration of NAD biosynthesis pathway in *E. coli*, including pathway intermediates and genes involved. Intermediates tested in *E. coli* growth assays are indicated by stars (blue restored growth, white did not). Bolded genes, *nadA* and *nadB*, are predicted to be responsible for NC101 auxotrophy. (B) Wild-type NC101 was grown in minimal media (MM), MM + vitamin mix (VM), or MM + NAD biosynthesis pathway intermediates: L-aspartate (L-Asp), quinolinic acid (Qa), nicotinamide (Nm), nicotinic acid (NA), and NAD. Culture density was evaluated at 2hr, 4hr, 8hr, or 24hr by OD<sub>600</sub>. (C) Growth curve of NC101 in MM with or without Qa, Nm, NA, or NAD. (B) Bars (n = 3-6) or (C) points (n = 3) depict mean +/- SEM. Significance (\*) is shown compared to NC101 growth in MM at (B) each timepoint or (C) 24hr and was determined at p < 0.05, using a one-way ANOVA with Dunnett's T3 multiple comparisons test.



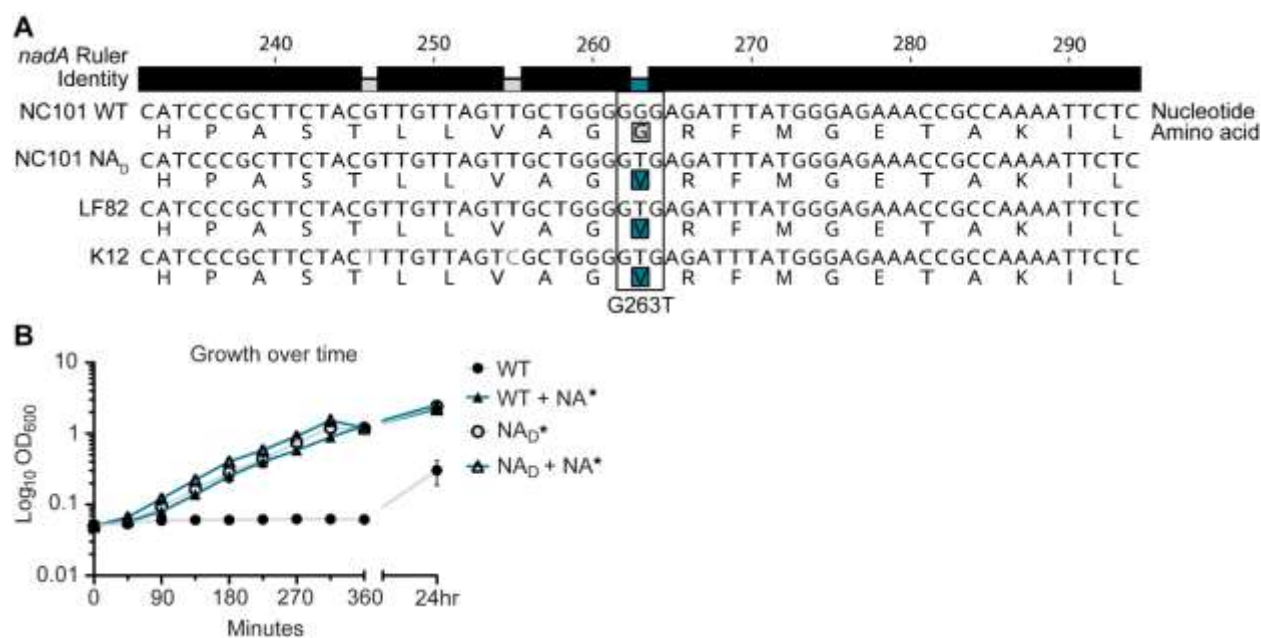

**Fig. 4. A missense mutation in NAD biosynthesis gene *nadA* confers NA auxotrophy in NC101.** (A) Genetic alignment of partial *nadA* sequence from NA auxotrophic (Wild-type (WT) NC101) and prototrophic (NC101 NA<sub>D</sub>, LF82, and K12) *E. coli*. Nucleotide and amino acid sequences, noted by 1 letter abbreviations, are shown. The ruler displays nucleotide position of coding sequence. The identity bar displays regions of similarity (black) or dissimilarity (grey or blue). The highlighted amino acids show the region of noted dissimilarity (*nadA* G263T) between NA auxotrophic (grey) and prototrophic (blue) *E. coli*. (B) A growth curve of WT NC101 and prototrophic revertant NC101 strain (NA<sub>D</sub>) in minimal media (MM) with and without nicotinic acid (NA). Growth was measured by culture optical density, OD<sub>600</sub>. Points depict mean  $\pm$  SEM (n = 4). Significance (\*) is shown compared to NC101 growth in MM at 24hr and was determined at p < 0.05, using a one-way ANOVA with Dunnett's T3 multiple comparisons test.

649

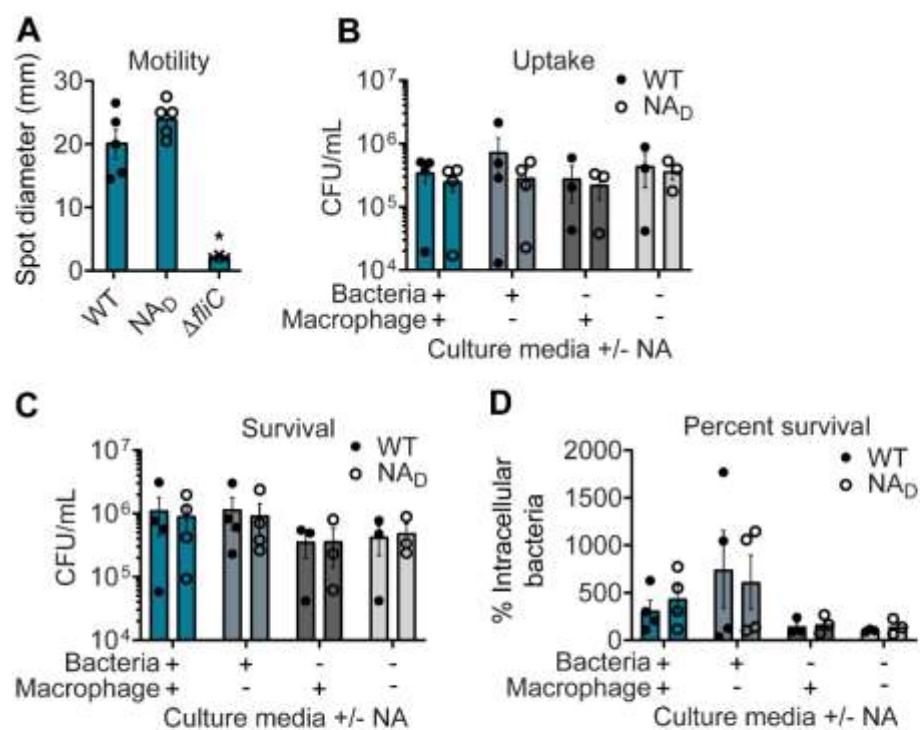

**Fig. 5. Correcting NA auxotrophy in NC101 has minimal impact on in vitro AIEC function.** (A) Wild-type (WT) NC101, prototrophic NC101 NA<sub>D</sub>, and non-motile control NC101 Δ*fliC* were grown on minimal media (MM) soft agar plates with nicotinic acid (NA). Diameter of motility swarm spots (mm) were measured at 8hr (n = 3-5). (B-D) J774A.1 murine macrophages were infected at a multiplicity of infection (MOI) = 10 with WT or NA<sub>D</sub>. Bacterial culture media before infection ("Bacteria") or cell culture media during infection ("Macrophage") were with or without NA supplementation. Number of bacteria are shown at (B) 1hr or (C) 24hr post-infection as Log<sub>10</sub> colony forming units (CFU)/mL. (D) Percent survival = [(CFU/mL at 24hr)/(CFU/mL at 1hr)×100 (n = 3-4). Bars depict mean +/- SEM. Significance (\*) is shown compared to WT NC101 and was determined at p < 0.05, using a (A) one-way ANOVA with Dunnett's T3 multiple comparisons test or (B-D) Welch's t test.

650

651

652

653

654

655

656

657

658 **Tables**

**Table 1**

*Escherichia coli* strains used in this study.

| <b>Strain</b>        | <b>Description of non-virulent <i>E. coli</i> strains</b>                           | <b>Isolated from:</b>             | <b>Adherent-invasive <i>E. coli</i> (AIEC) Status</b> | <b>Reference or Source</b>            |
|----------------------|-------------------------------------------------------------------------------------|-----------------------------------|-------------------------------------------------------|---------------------------------------|
| Wild-type (WT) NC101 | Streptomycin resistant (Str <sup>R</sup> ) isolate of classical murine-derived AIEC | Laboratory <i>E. coli</i> isolate | AIEC                                                  | (34), This study                      |
| LF82                 | Classical human-adapted clinical AIEC isolate                                       | Crohn's disease patient           | AIEC                                                  | (48)                                  |
| 42ET-1               | Clinical AIEC isolate                                                               | Non-IBD <sup>a</sup> patient      | AIEC                                                  | (40)                                  |
| 568-3                | Clinical AIEC isolate                                                               | Crohn's disease patient           | AIEC                                                  | (40)                                  |
| K12 (MG1655)         | Model <i>E. coli</i> strain                                                         | Laboratory <i>E. coli</i> isolate | Non-AIEC                                              | ATCC <sup>®</sup> 700926 <sup>™</sup> |
| 25922                | Model <i>E. coli</i> strain                                                         | Patient                           | Non-AIEC                                              | ATCC <sup>®</sup> 25922 <sup>™</sup>  |

|                                                                               |                                                                                 |                                   |                                                          |            |
|-------------------------------------------------------------------------------|---------------------------------------------------------------------------------|-----------------------------------|----------------------------------------------------------|------------|
| HM670                                                                         | Clinical <i>E. coli</i> isolate                                                 | Crohn's disease patient           | Non-AIEC, but has enhanced survival in macrophages       | (47)       |
| 37RT-2                                                                        | Clinical <i>E. coli</i> isolate                                                 | Non-IBD <sup>a</sup> patient      | Non-AIEC                                                 | (40)       |
| 532-9                                                                         | Clinical <i>E. coli</i> isolate                                                 | Crohn's disease patient           | Non-AIEC                                                 | (40)       |
| 39ES-1                                                                        | Clinical <i>E. coli</i> isolate                                                 | Crohn's disease patient           | Non-AIEC                                                 | (40)       |
| Nicotinic acid revertant (NA <sub>derivative</sub> or NA <sub>D</sub> ) NC101 | Spontaneous prototrophic revertant of WT NC101 (G263T mutation in <i>nadA</i> ) | Laboratory <i>E. coli</i> isolate | N.D. <sup>b</sup> , but exhibits survival in macrophages | This study |
| NC101 $\Delta$ <i>fliC</i>                                                    | Non-motile flagellin mutant derived from WT NC101                               | Laboratory <i>E. coli</i> isolate | N.D. <sup>b</sup>                                        | This study |

---

<sup>a</sup>IBD = inflammatory bowel disease, <sup>b</sup>N.D. = not determined

659

660

**Table 2**

*Repository information for published genomic sequences.*

| Accession    | Sample Name | Strain                                                                                        | Organism       | Tax ID | BioProject  | Used in this study? | URL                                                                                                                               |
|--------------|-------------|-----------------------------------------------------------------------------------------------|----------------|--------|-------------|---------------------|-----------------------------------------------------------------------------------------------------------------------------------|
| SAMN16810910 | JA0058      | Original NC101 strain                                                                         | <i>E. coli</i> | 562    | PRJNA678715 | No                  | <a href="https://www.ncbi.nlm.nih.gov/biosample/SAMN16810910/">https://www.ncbi.nlm.nih.gov/biosample/SAMN16810910/</a>           |
| SAMN16810911 | JA0072      | Streptomycin resistant (WT NC101) (Str <sup>R</sup> ) isolate of original NC101               | <i>E. coli</i> | 562    | PRJNA678715 | Yes                 | <a href="https://www.ncbi.nlm.nih.gov/biosample/?term=SAMN16810911">https://www.ncbi.nlm.nih.gov/biosample/?term=SAMN16810911</a> |
| SAMN16810912 | JA0257      | Spontaneous prototrophic revertant of Str <sup>R</sup> NC101 (G263T mutation in <i>nadA</i> ) | <i>E. coli</i> | 562    | PRJNA678715 | Yes                 | <a href="https://www.ncbi.nlm.nih.gov/biosample/?term=SAMN16810912">https://www.ncbi.nlm.nih.gov/biosample/?term=SAMN16810912</a> |

|        |        |               |                |     |          |    |                                                                                        |
|--------|--------|---------------|----------------|-----|----------|----|----------------------------------------------------------------------------------------|
| SAMN16 | JA0265 | Spontaneous   | <i>E. coli</i> | 562 | PRJNA678 | No | <a href="https://www.ncbi.nlm.nih.gov/biosample/?term=SAMN16810913">https://www.n</a>  |
| 810913 |        | prototrophic  |                |     | 715      |    | <a href="https://www.ncbi.nlm.nih.gov/biosample/?term=SAMN16810913">cbi.nlm.nih.go</a> |
|        |        | revertant of  |                |     |          |    | <a href="https://www.ncbi.nlm.nih.gov/biosample/?term=SAMN16810913">v/biosample/?</a>  |
|        |        | original      |                |     |          |    | <a href="https://www.ncbi.nlm.nih.gov/biosample/?term=SAMN16810913">term=SAMN1</a>     |
|        |        | NC101         |                |     |          |    | <a href="https://www.ncbi.nlm.nih.gov/biosample/?term=SAMN16810913">6810913</a>        |
|        |        | (G263T        |                |     |          |    |                                                                                        |
|        |        | mutation in   |                |     |          |    |                                                                                        |
|        |        | <i>nadA</i> ) |                |     |          |    |                                                                                        |
| SAMN16 | JA0266 | Spontaneous   | <i>E. coli</i> | 562 | PRJNA678 | No | <a href="https://www.ncbi.nlm.nih.gov/biosample/?term=SAMN1810914">https://www.n</a>   |
| 810914 |        | prototrophic  |                |     | 715      |    | <a href="https://www.ncbi.nlm.nih.gov/biosample/?term=SAMN1810914">cbi.nlm.nih.go</a>  |
|        |        | revertant of  |                |     |          |    | <a href="https://www.ncbi.nlm.nih.gov/biosample/?term=SAMN1810914">v/biosample/?</a>   |
|        |        | original      |                |     |          |    | <a href="https://www.ncbi.nlm.nih.gov/biosample/?term=SAMN1810914">term=SAMN1</a>      |
|        |        | NC101         |                |     |          |    | <a href="https://www.ncbi.nlm.nih.gov/biosample/?term=SAMN1810914">6810914</a>         |
|        |        | (T1014G       |                |     |          |    |                                                                                        |
|        |        | mutation in   |                |     |          |    |                                                                                        |
|        |        | <i>nadA</i> ) |                |     |          |    |                                                                                        |

661

### Table 3

*Primers used for strain construction.*

| Primer                | Sequence (5'-3')                      | Reference  |
|-----------------------|---------------------------------------|------------|
| Knockout_ <i>fliC</i> | GGAAACCCAAAACGTAATCAACGACTTGCAATATAG  | This study |
| forward               | GATAACGAA TCATGATT CCGGGGATCCG TCGACC |            |

|                        |                                      |            |
|------------------------|--------------------------------------|------------|
| Knockout_ <i>fliC</i>  | GTCAGTCTCAGTTAATCAGGTTACGACGATTAACCC | This study |
| reverse                | TGCAGCAGAGACAGTGTAGGCTGGAGCTGCTTCG   |            |
| <i>fliC</i> upstream   | GACGATAACAGGGTTGACGG                 | This study |
| <i>fliC</i> downstream | ATTGCAATTCCCCTTGTAGG                 | This study |

---

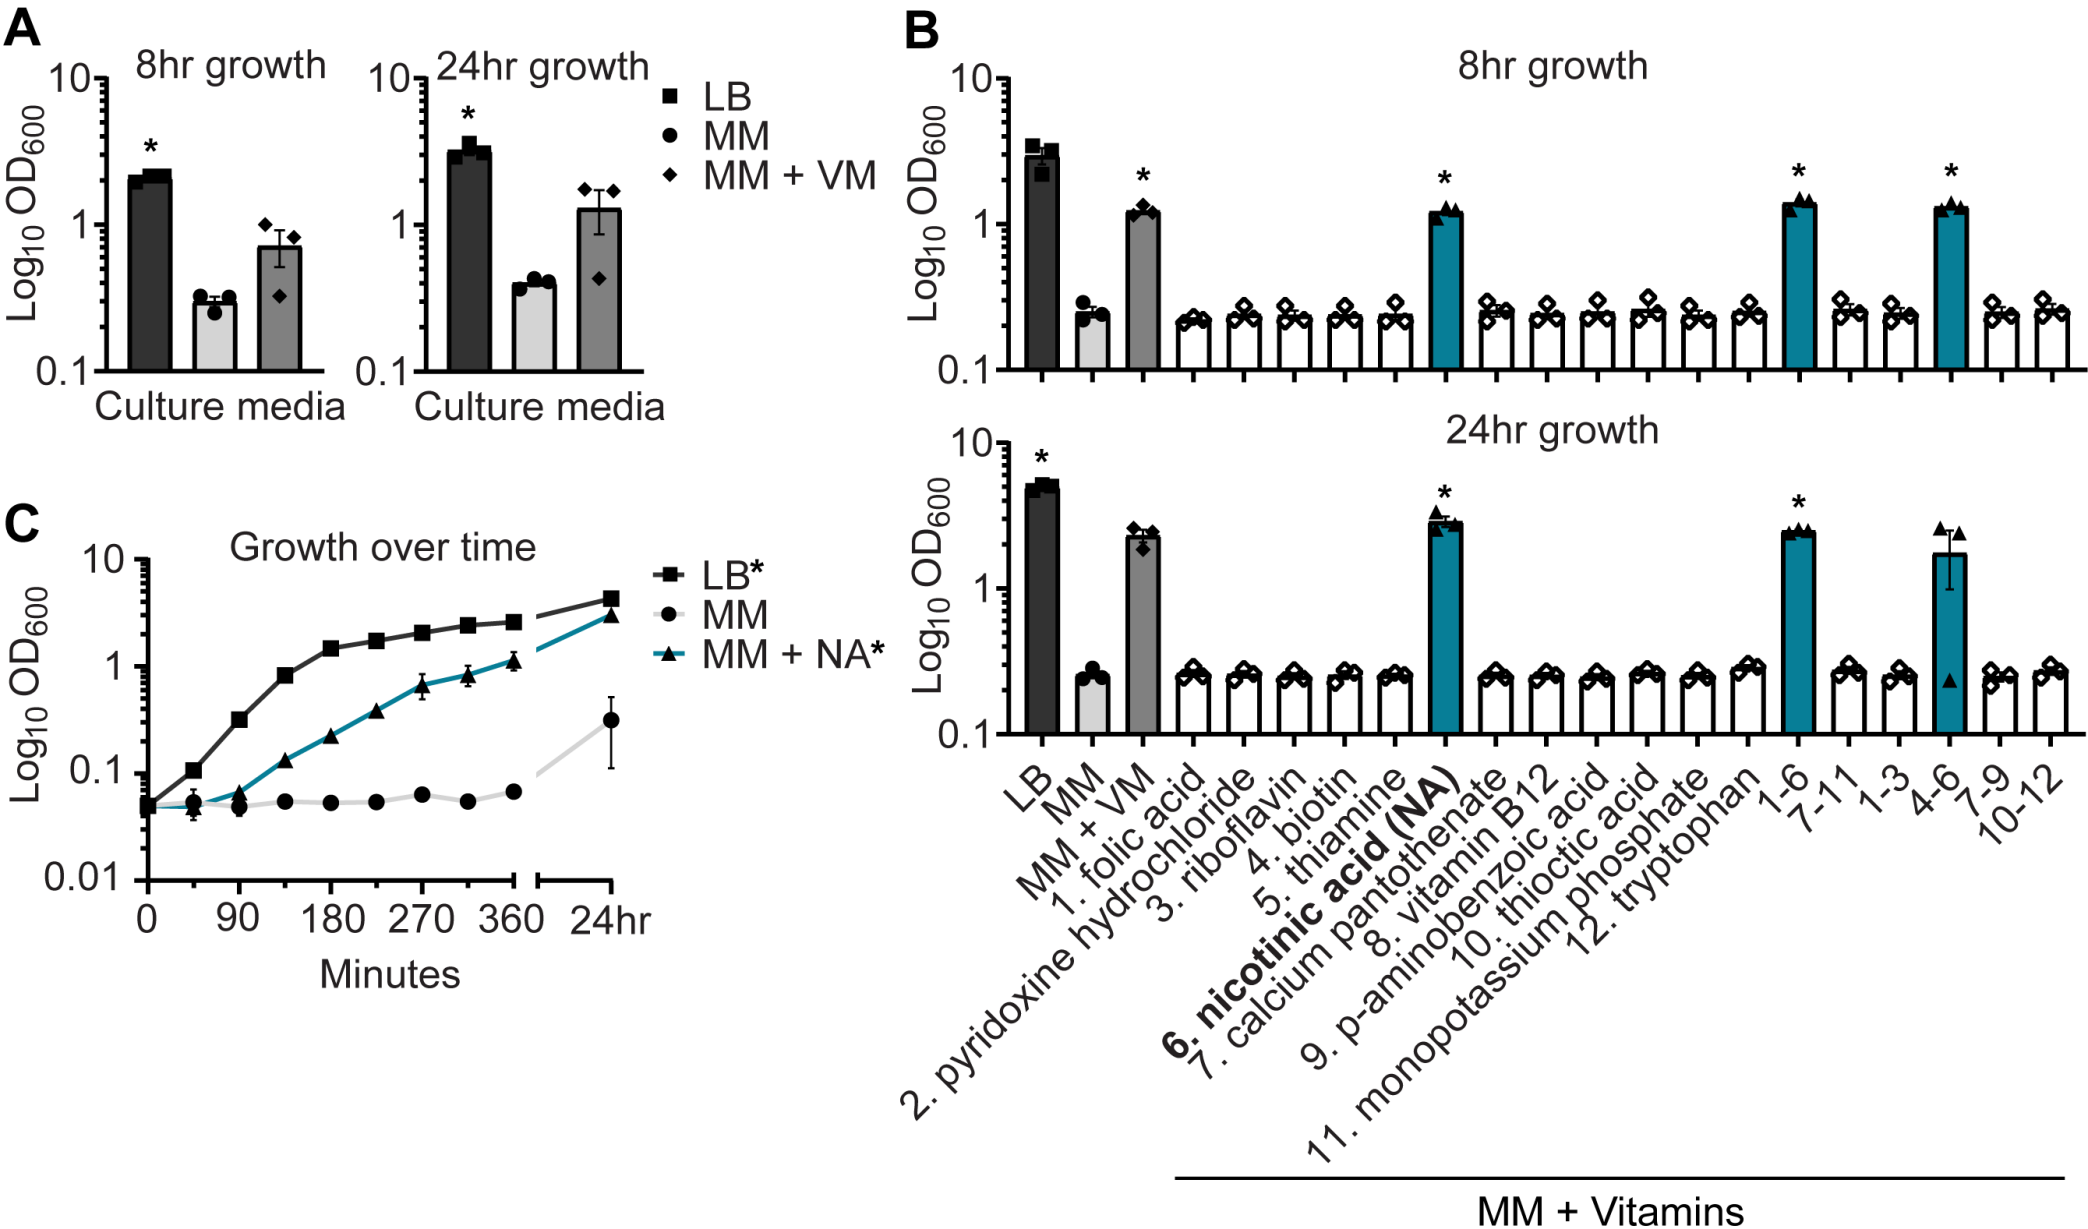

**Fig. 1. Nicotinic acid restores growth of *E. coli* NC101 in minimal media.** (A) Wild-type NC101 was grown in Luria-Bertani (LB) broth, minimal media (MM), or MM + vitamin mix (VM). Growth was measured at 8hr and 24hr by culture optical density, OD<sub>600</sub>. (B) NC101 was grown in LB, MM, MM + VM, or MM supplemented with individual or combinations of vitamins and tryptophan. OD<sub>600</sub> was assessed at 8hr and 24hr. (C) Growth curve of NC101 in LB, MM, or MM + NA. (A, B) Bars (n = 3) or (C) points (n = 4) depict mean +/- SEM. Significance (\*) is shown compared to NC101 growth in MM at (A,B) each timepoint or (C) 24hr and was determined at p < 0.05, using a one-way ANOVA with Dunnett's T3 multiple comparisons test.



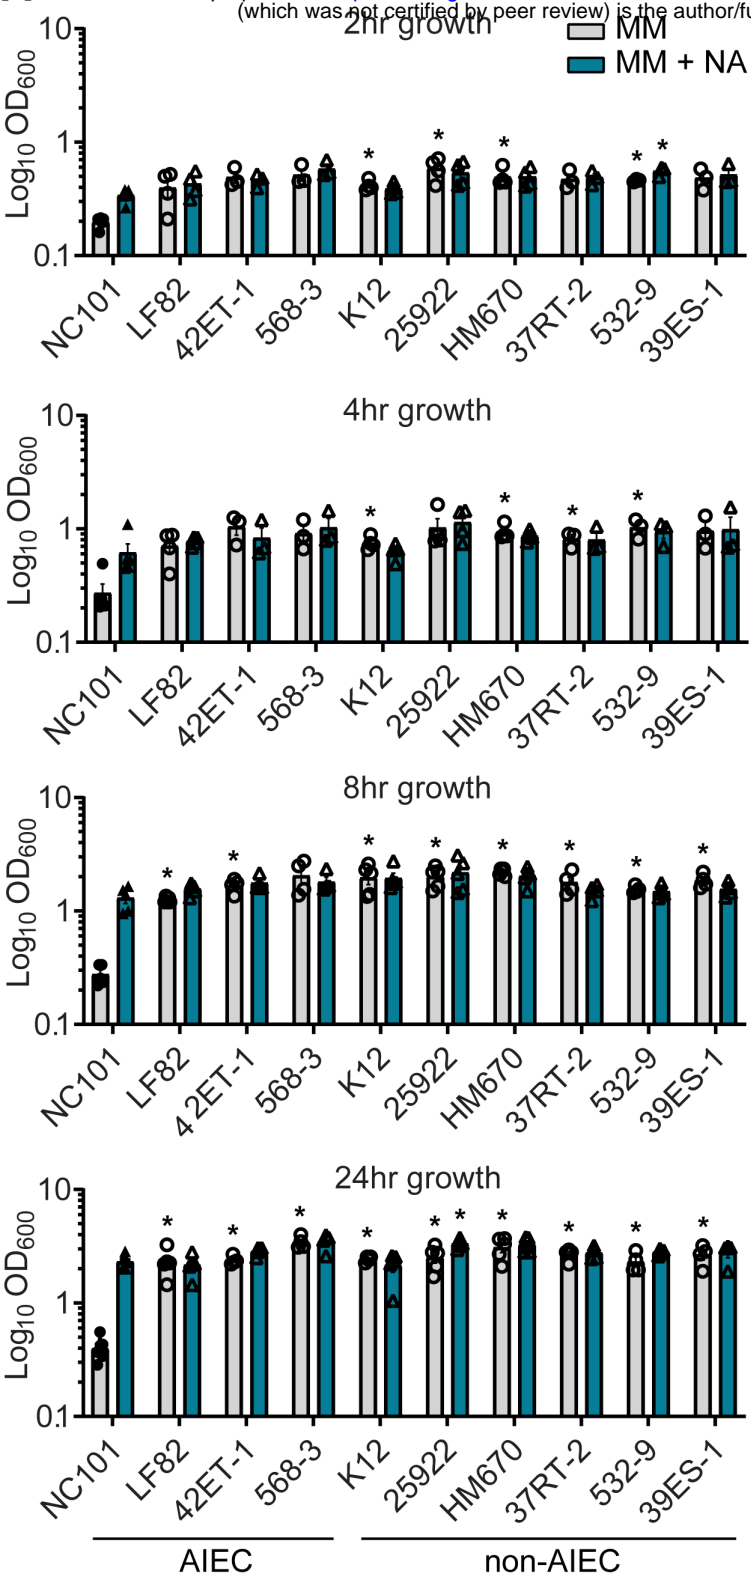

**Fig. 2 NA auxotrophy is not common among non-toxi-**

**genic E. coli strains, including prototypic AIEC LF82.** (A) AIEC and non-AIEC *E. coli* isolates, were grown in minimal media (MM) with and without nicotinic acid (NA). Growth was evaluated at 2hr, 4hr, 8hr, and 24hr by OD<sub>600</sub>. (B) Growth curve of wild-type NC101 and LF82 (human-derived AIEC) in MM with and without NA. (A) Bars (n = 3-6) or (B) points (n = 3) depict mean +/- SEM. (A) Strains grown in MM were compared to NC101 grown in MM, and strains grown in MM + NA were compared to NC101 grown in MM + NA. Significance (\*) is shown compared at (A) each timepoint or (B) 24hr and was determined at p < 0.05, using a one-way ANOVA with Dunnett's T3 multiple comparisons test.

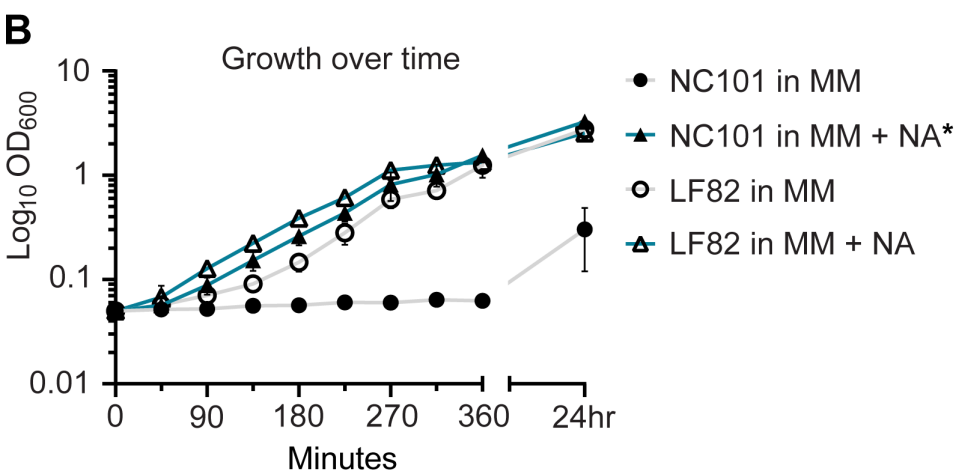

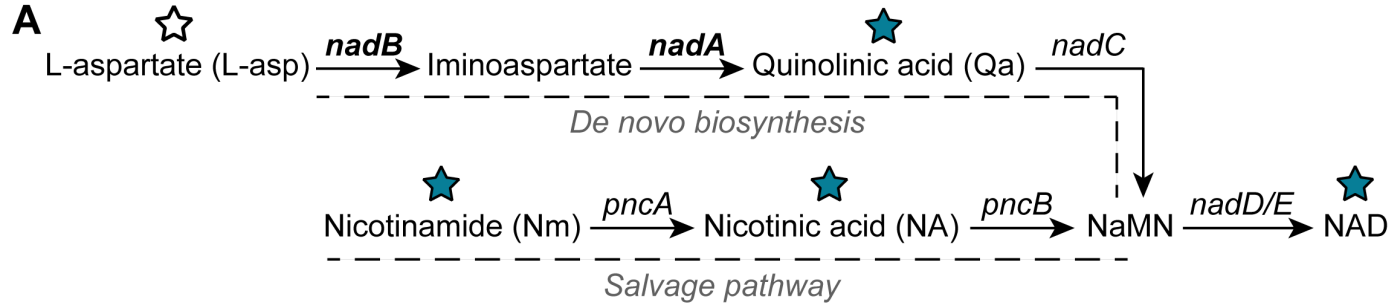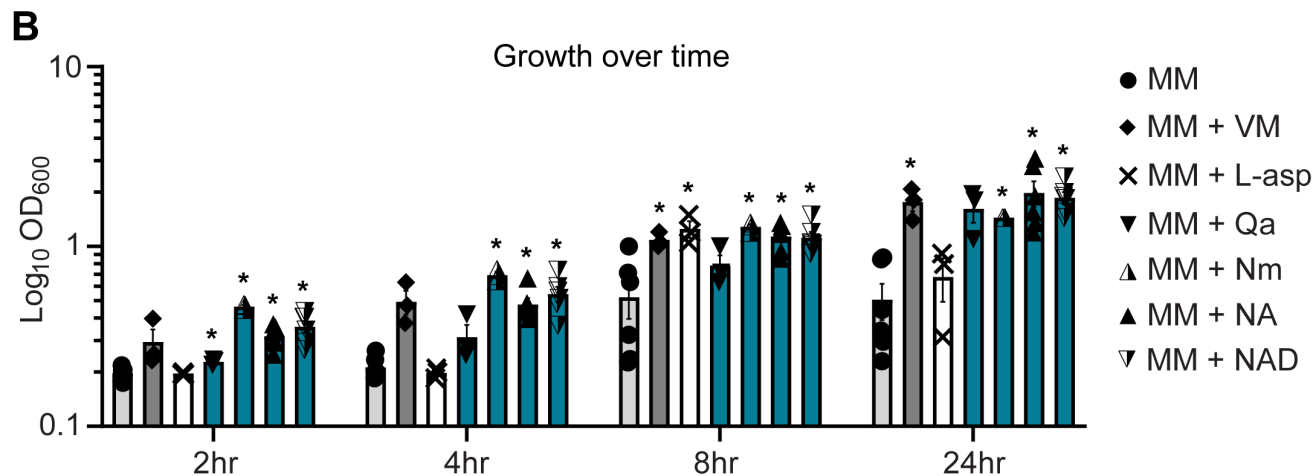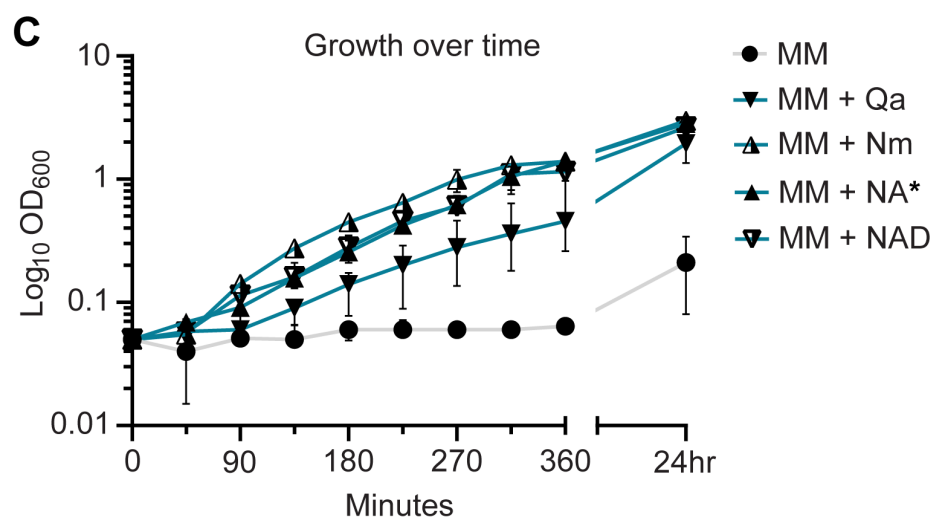

**Fig. 3. NC101 has a defect in the de novo NAD biosynthesis pathway.** (A) Illustration of NAD biosynthesis pathway in *E. coli*, including pathway intermediates and genes involved. Intermediates tested in *E. coli* growth assays are indicated by stars (blue restored growth, white did not). Bolded genes, *nadA* and *nadB*, are predicted to be responsible for NC101 auxotrophy. (B) Wild-type NC101 was grown in minimal media (MM), MM + vitamin mix (VM), or MM + NAD biosynthesis pathway intermediates: L-aspartate (L-Asp), quinolinic acid (Qa), nicotinamide (Nm), nicotinic acid (NA), and NAD. Culture density was evaluated at 2hr, 4hr, 8hr, or 24hr by OD<sub>600</sub>. (C) Growth curve of NC101 in MM with or without Qa, Nm, NA, or NAD. (B) Bars (n = 3-6) or (C) points (n = 3) depict mean  $\pm$  SEM. Significance (\*) is shown compared to NC101 growth in MM at (B) each timepoint or (C) 24hr and was determined at  $p < 0.05$ , using a one-way ANOVA with Dunnett's T3 multiple comparisons test.

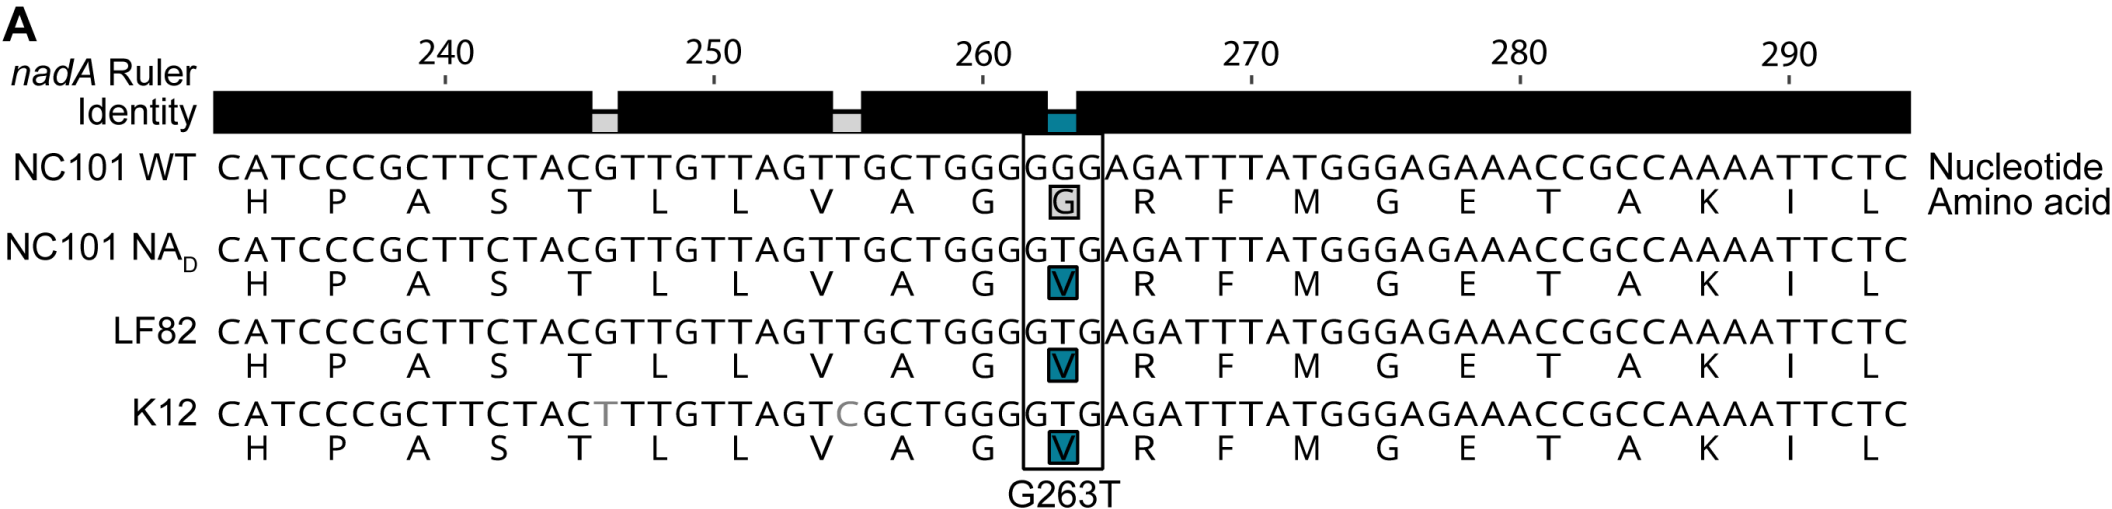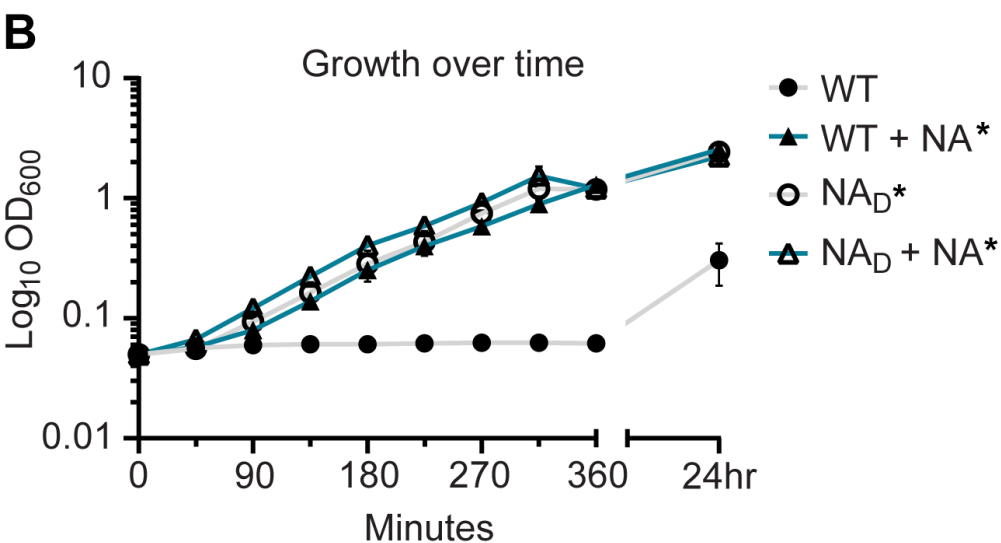

**Fig. 4. A missense mutation in NAD biosynthesis gene *nadA* confers NA auxotrophy in NC101.** (A) Genetic alignment of partial *nadA* sequence from NA auxotrophic (Wild-type (WT) NC101) and prototrophic (NC101 NAD, LF82, and K12) *E. coli*. Nucleotide and amino acid sequences, noted by 1 letter abbreviations, are shown. The ruler displays nucleotide position of coding sequence. The identity bar displays regions of similarity (black) or dissimilarity (grey or blue). The highlighted amino acids show the region of noted dissimilarity (*nadA* G263T) between NA auxotrophic (grey) and prototrophic (blue) *E. coli*. (B) A growth curve of WT NC101 and prototrophic revertant NC101 strain (NA<sub>D</sub>) in minimal media (MM) with and without nicotinic acid (NA). Growth was measured by culture optical density, OD<sub>600</sub>. Points depict mean +/- SEM (n = 4). Significance (\*) is shown compared to NC101 growth in MM at 24hr and was determined at p < 0.05, using a one-way ANOVA with Dunnett's T3 multiple comparisons test.

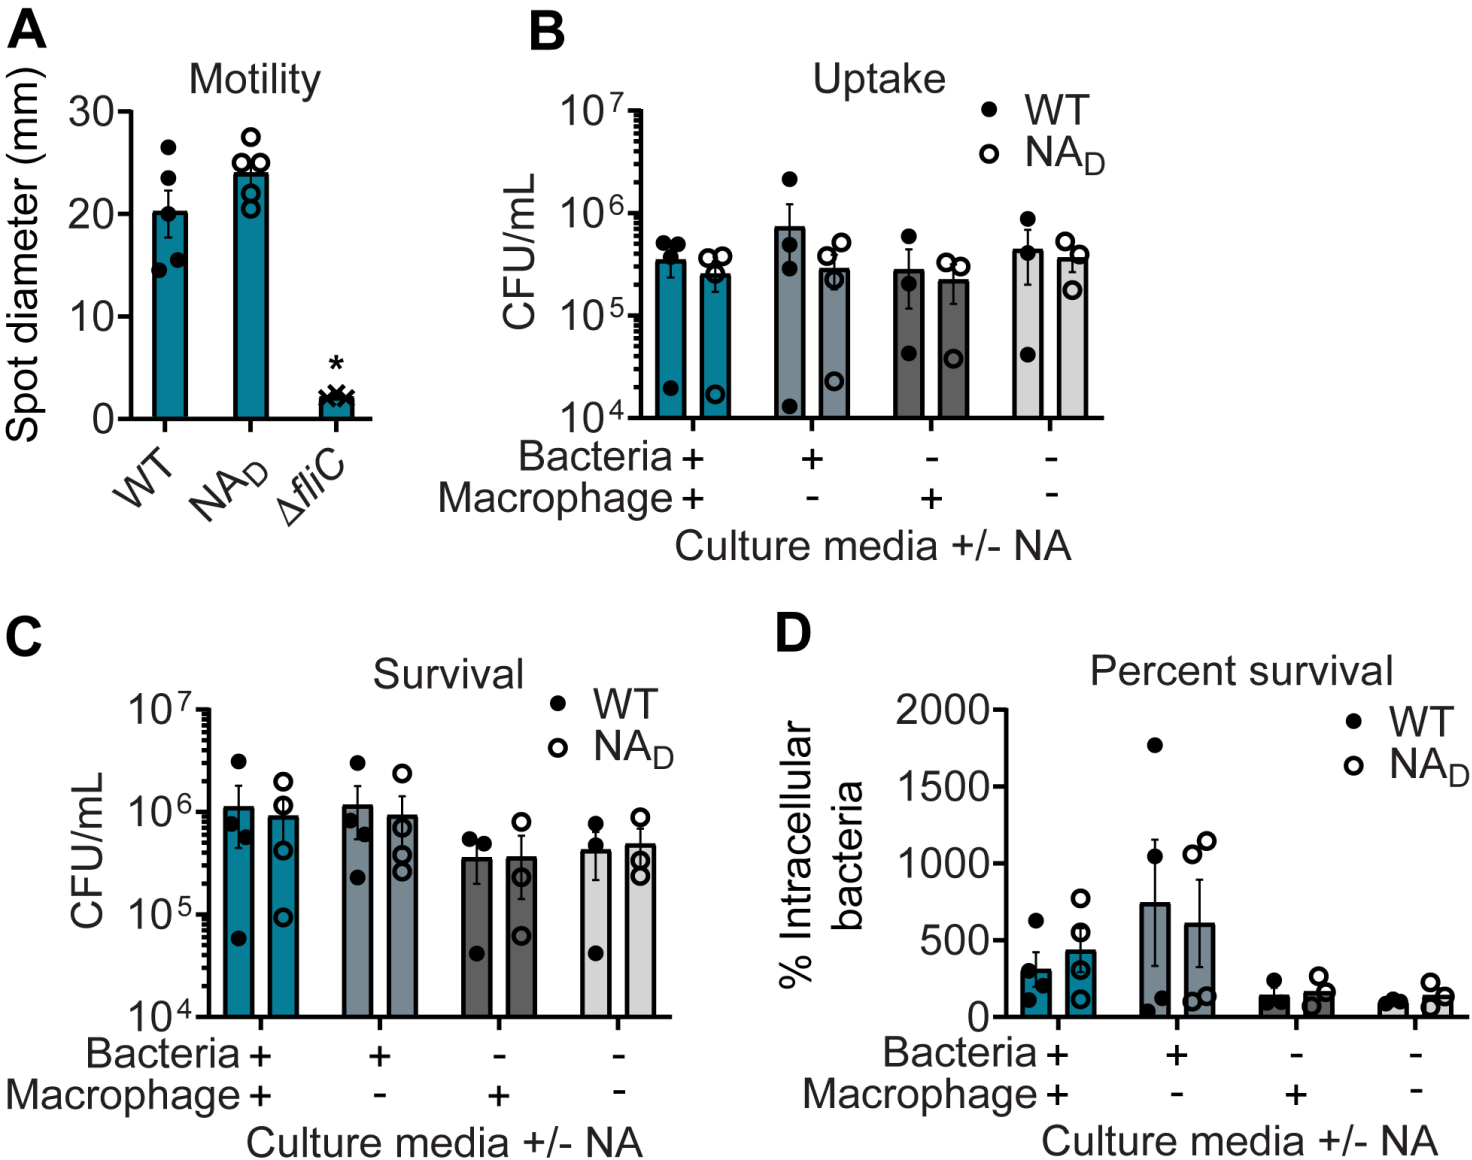

**Fig. 5. Correcting NA auxotrophy in NC101 has minimal impact on in vitro AIEC function.** (A) Wild-type (WT) NC101, prototrophic NC101 NA<sub>D</sub>, and non-motile control NC101 *ΔfliC* were grown on minimal media (MM) soft agar plates with nicotinic acid (NA). Diameter of motility swarm spots (mm) were measured at 8hr (n = 3-5). (B-D) J774A.1 murine macrophages were infected at a multiplicity of infection (MOI) = 10 with WT or NA<sub>D</sub>. Bacterial culture media before infection ("Bacteria") or cell culture media during infection ("Macrophage") were with or without NA supplementation. Number of bacteria are shown at (B) 1hr or (C) 24hr post-infection as Log<sub>10</sub> colony forming units (CFU)/mL. (D) Percent survival = [(CFU/mL at 24hr)/(CFU/mL at 1hr)] × 100 (n = 3-4). Bars depict mean ± SEM. Significance (\*) is shown compared to WT NC101 and was determined at p < 0.05, using a (A) one-way ANOVA with Dunnett's T3 multiple comparisons test or (B-D) Welch's t test.
